# Supplementary material
Source: PubMed Central journal article supplement (PMC6410571)
Supplement: NIHMS1013236-supplement-Supplementary_Information.pdf [file NIHMS1013236-supplement-Supplementary_Information.pdf]

In the format provided by the authors and unedited.

# Increased synapse elimination by microglia in schizophrenia patient-derived models of synaptic pruning

Carl M. Sellgren <sup>1,2,3\*</sup>, Jessica Gracias<sup>1,2,3</sup>, Bradley Watmuff<sup>1,2</sup>, Jonathan D. Biag <sup>4</sup>,  
Jessica M. Thanos <sup>1,2</sup>, Paul B. Whittredge<sup>4</sup>, Ting Fu<sup>1,2</sup>, Kathleen Worringer<sup>4</sup>, Hannah E. Brown<sup>1,2</sup>,  
Jennifer Wang<sup>1,2</sup>, Ajamete Kaykas<sup>4</sup>, Rakesh Karmacharya<sup>1,2,5</sup>, Carleton P. Goold<sup>4</sup>, Steven D. Sheridan<sup>1,2</sup>  
and Roy H. Perlis <sup>1,2\*</sup>

---

<sup>1</sup>Center for Quantitative Health, Center for Genomic Medicine and Department of Psychiatry, Massachusetts General Hospital, Boston, MA, USA.

<sup>2</sup>Department of Psychiatry, Harvard Medical School, Boston, MA, USA. <sup>3</sup>Department of Physiology and Pharmacology, Karolinska Institutet, Stockholm, Sweden. <sup>4</sup>Novartis Institutes for BioMedical Research, Cambridge, MA, USA. <sup>5</sup>Schizophrenia and Bipolar Disorder Program, McLean Hospital, Belmont, MA, USA. \*e-mail: [carl.sellgren@ki.se](mailto:carl.sellgren@ki.se); [rperlis@mgh.harvard.edu](mailto:rperlis@mgh.harvard.edu)

## Supplementary Figure 1.

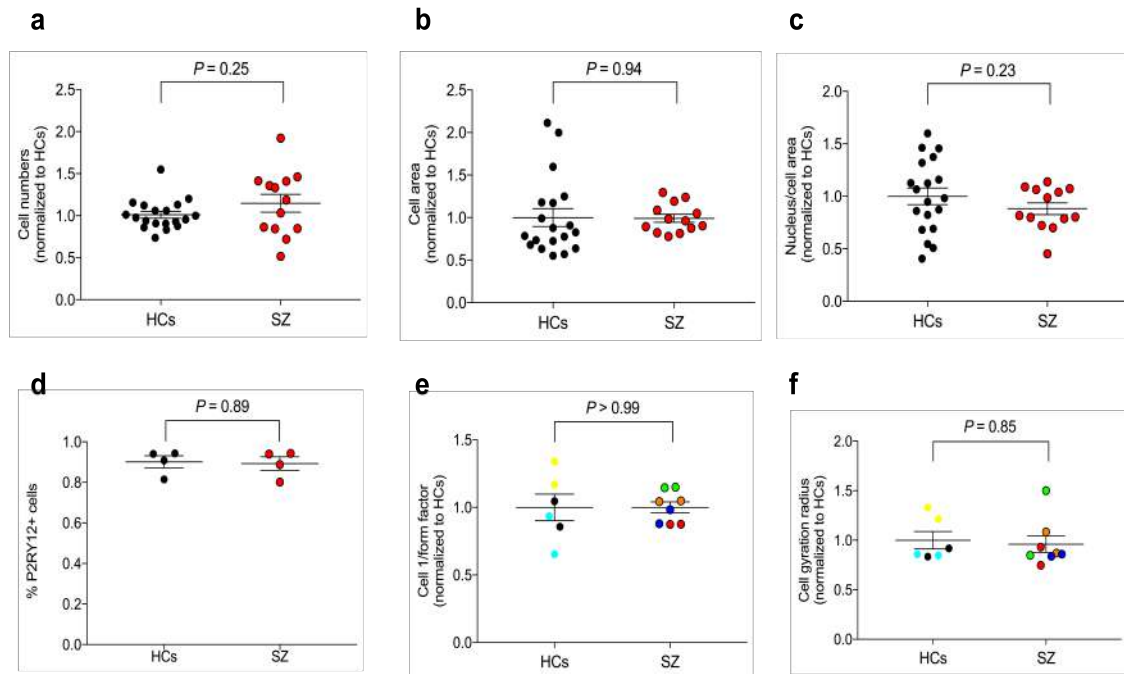

**Supplementary Figure 1.** Characteristics of induced microglia-like cells (iMGs). **(a) – (c)** display cell numbers, cell area ( $\mu\text{m}$ ), and nucleus / cell body area ratio for individuals included in comparison of phagocytic uptake of synaptosomes (Fig. 3c) between healthy controls (HCs;  $n = 19$ ) and schizophrenia subjects (SZ;  $n = 13$ ). Multiple transdifferentiations per subject are plotted as one mean. All data normalized to HCs. We also confirmed lack of influence of these parameters on phagocytic index (i.e. PSD-95 engulfment) **(a)**  $r = 0.09$ ;  $P = 0.62$ , **(b)**  $r = -0.1$ ;  $P = 0.58$ , and **(c)**  $r = 0.008$ ;  $P = 0.96$ , respectively. Each comparison is based on data from 38,967 cells. **(d)** Transdifferentiation yielded around 90% purity as assessed by positive staining for the microglial-enriched protein P2RY12 across a subset of 4 HCs and 4 SZ subjects. Based on a total of and based on data from 4,467 cells. **(e)** and **(f)** display measurements of cell shape homogeneity for a subset of 3 HCs vs. 4 SZ subjects with 2 transdifferentiations per subject plotted individually and in same color. All data normalized to HCs. Groups were compared using  $t$ -tests in panel a – c and in d – f using a Mann-Whitney  $U$ -test. All reported p-values are two-sided. Mean and SEM is shown in each plot.

## Supplementary Figure 2.

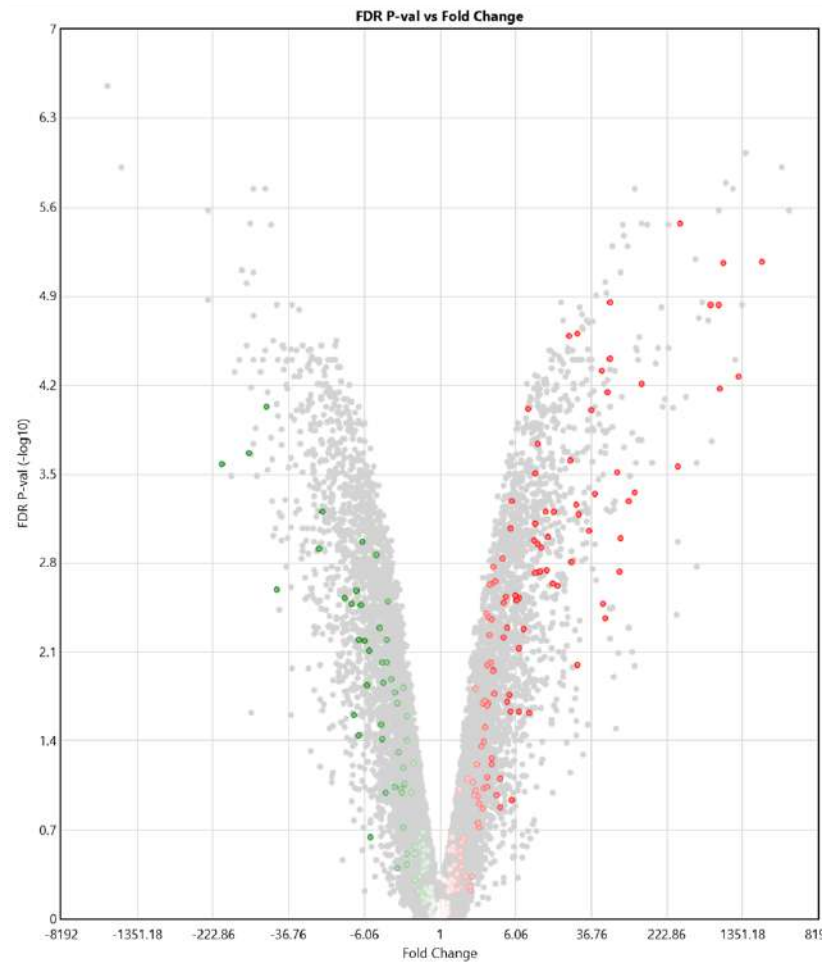

**Supplementary Figure 2.** Log<sub>2</sub> fold changes (mRNA expression in monocytes, n = 2 subjects, vs. induced microglia-like cells [iMGs], n = 3 subjects) plotted against FDR-adjusted (Benjamini-Hochberg) two-sided p-values (derived from one-way ANOVAs). Red (higher expression in iMGs) and green (higher expression in monocytes) indicate microglia-specific genes as reported by Bennett, M.L., *et al.* (New tools for studying microglia in the mouse and human CNS. *Proc Natl Acad Sci U S A* **113**, E1738-1746 (2016)).

### Supplementary Figure 3

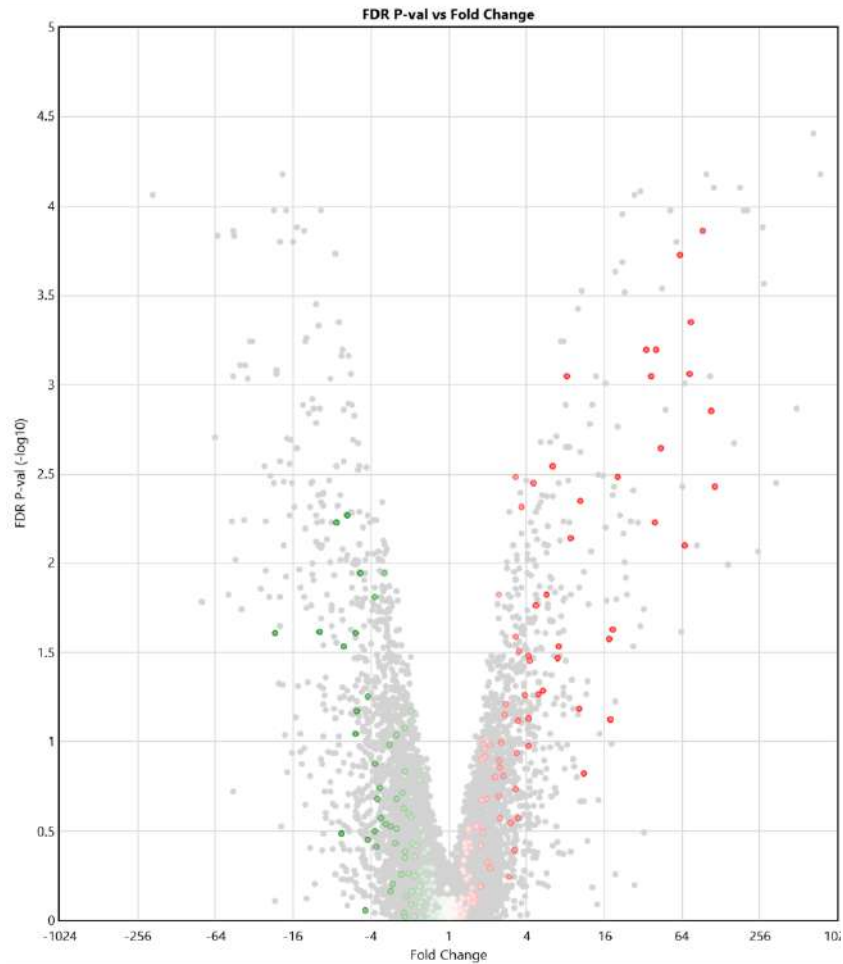

**Supplementary Figure 3.** Log<sub>2</sub> fold changes (mRNA expression in monocytes-derived macrophages, n=3, vs. induced microglia-like cells [iMGs], n=3) plotted against FDR-adjusted (Benjamini-Hochberg) two-sided p-values (derived from one-way ANOVAs). Red (higher expression in iMGs) and green (higher expression in monocytes) indicate microglia-specific genes as reported by Bennett, M.L., *et al.* (New tools for studying microglia in the mouse and human CNS. *Proc Natl Acad Sci U S A* **113**, E1738-1746 (2016)).

## Supplementary Figure 4

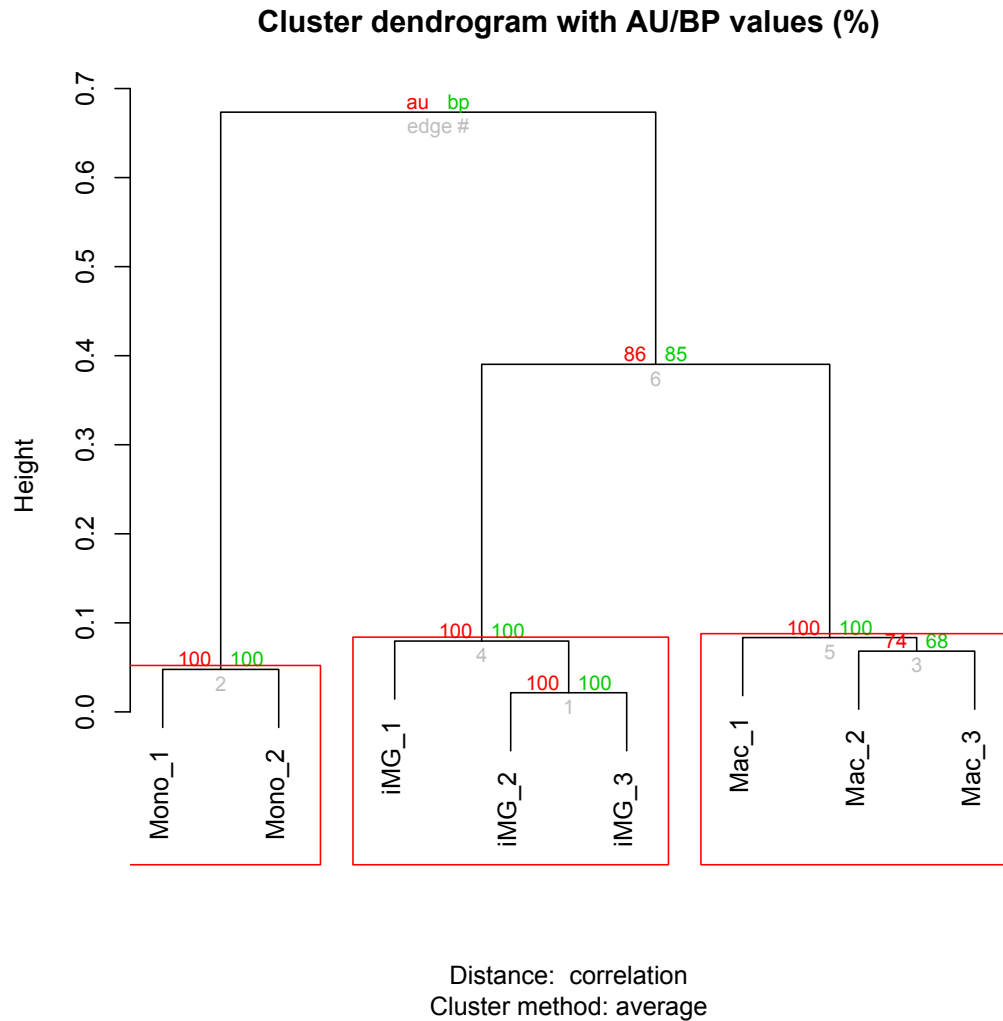

**Supplementary Figure 4.** Hierarchical cluster analysis (correlation as distance metric) of mRNA expression in monocytes (Mono), monocyte-derived macrophages (Mac), and induced microglia-like cells (iMGs), using the R package pvclust. Uncertainty in clustering is assessed via multiscale bootstrap resampling (nboot = 10,000) and Approximately Unbiased (AU) probability value as well as ordinary Bootstrap Probability (BP) value is provided for each cluster. Clusters with a significance level below 0.05, corresponds to AU/BP>95, are highlighted.

## Supplementary Figure 5

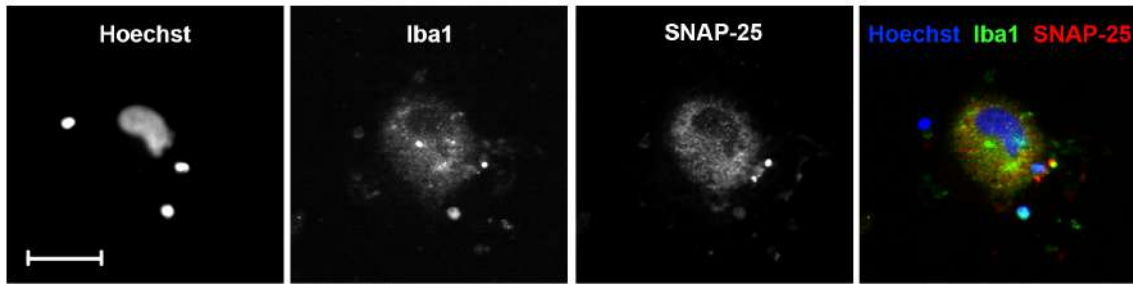

**Supplementary Figure 5.** Co-localization and engulfment of the pre-synaptic marker SNAP25 (red) by iMGs (green, IBA1) in co-culture. Experiments were repeated independently in 3 different subjects (3-8 cell culture replicates per subject) with similar results. Scale bar 30μm.

## Supplementary Figure 6

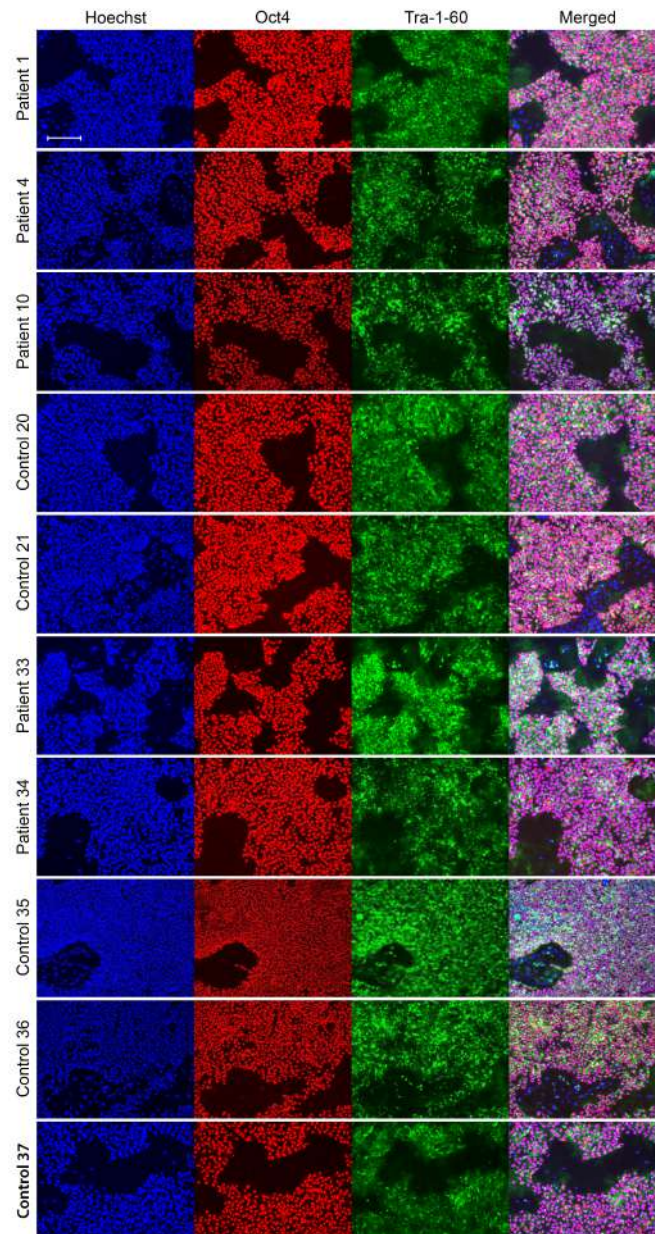

**Supplementary Figure 6.** Representative immunocytochemical characterization of pluripotent markers (OCT4, TRA 1-60) of control and patient-derived iPSC lines. Scale bar 100  $\mu$ m. Experiments were repeated in eight independently iPSC-derivations across 8 subjects with similar results.

Supplementary Figure 7.

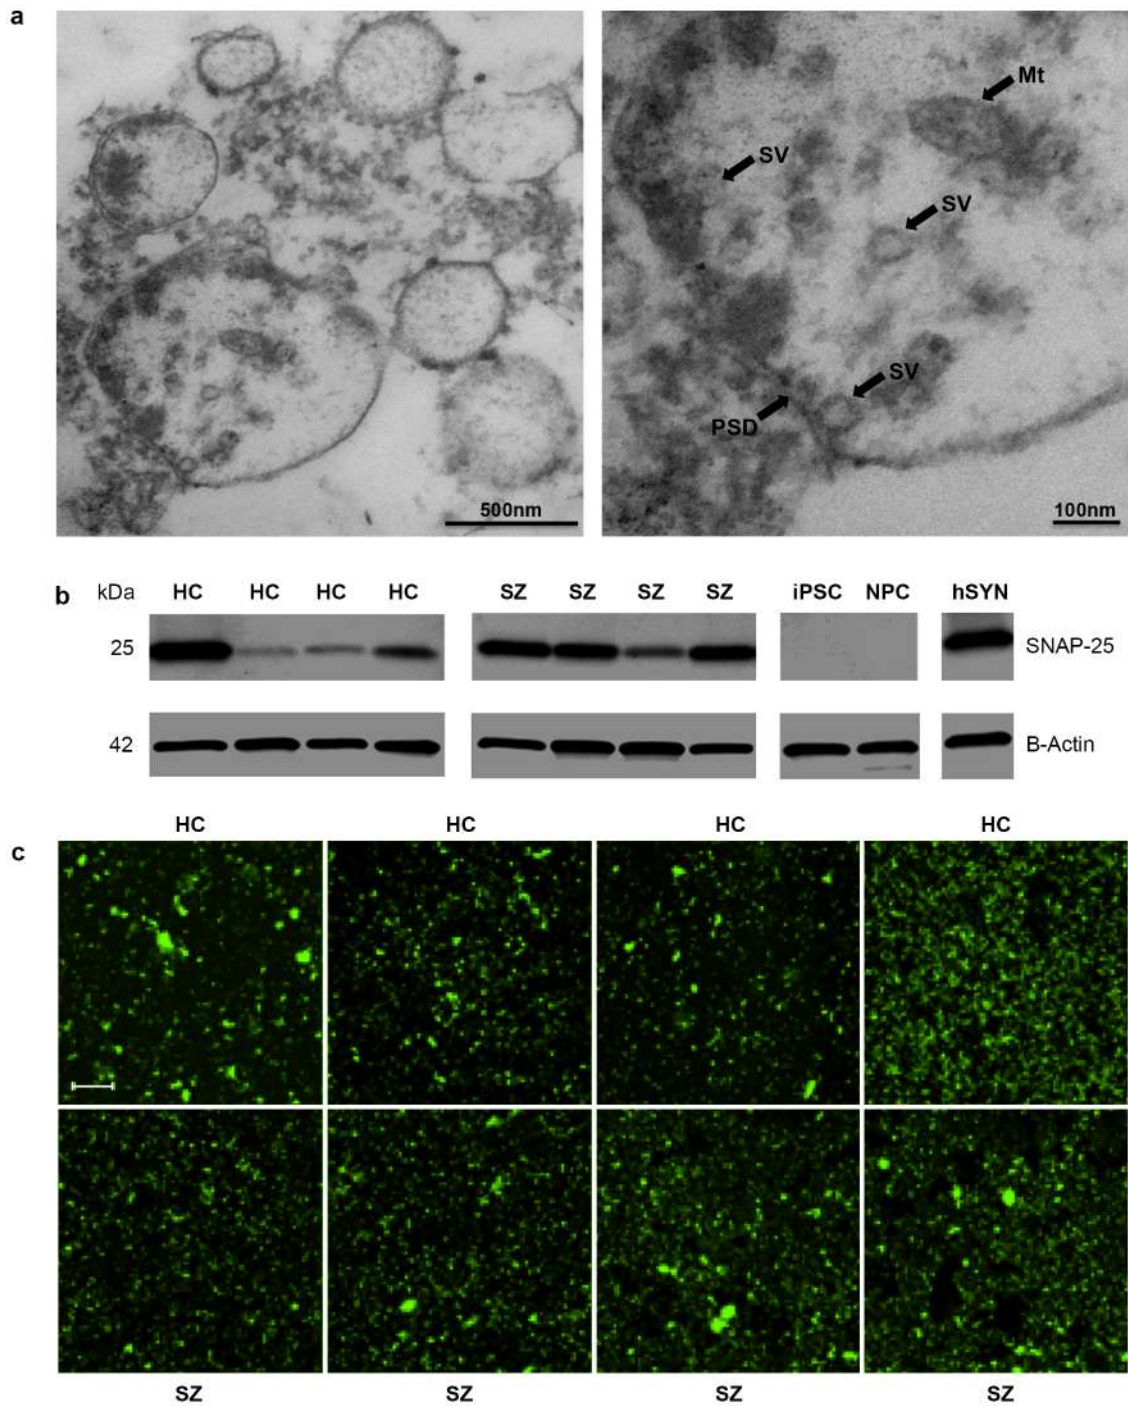

**Supplementary Figure 7. (a)**Transmission electron microscopy of isolated and fixed synaptosome suspensions examined at 60K (left) and 120K (right) magnification. Arrows indicate synaptic features PSD (post synaptic density), SV (synaptic vesicles) and Mt (mitochondria). Experiments were repeated independently in 2 different subjects (2 samples



per subject) with similar results. **(b)** Western analyses for the synaptic marker SNAP25 in synaptosome preparations. Lanes: 1-8, preparations from 4 healthy control (HC) and 4 schizophrenia (SZ) subjects in main analysis measuring phagocytic uptake of PSD-95 in induced microglia-like cells (iMGs). Lane 9, input iPSCs; lane 10, input NPCs; lane 11, post-mortem human brain synaptosome prep. We observed no significant difference in SNAP25 content (normalized to  $\beta$ -actin and in triplicates) between SZ subjects and HCs (Median: 0.54 [IQR: 0.15], HC: 0.42 [0.83], respectively, Mann-Whitney  $U$  test:  $P=0.94$ ). Higher SNAP25 protein levels in synaptosome preparations did not predict higher phagocytic indexes ( $r_{(spearman)} = -0.12$ ;  $P=0.78$ ), nor did total protein levels ( $r_s = -0.36$ ;  $P=0.12$ ). **(c)** Representative images of the 4 SZ and HC synaptosome preparations showing PSD95<sup>+</sup> ICC staining. 40 randomly selected images per line were taken and automatically quantified using INCell Analyzer software. No difference in PSD95<sup>+</sup> counts could be observed on group level (HC median: 5884 [IQR; 5529], SZ median: 6511 [2516]; Mann-Whitney  $U$  test:  $P=0.69$ ) umber of PSD95<sup>+</sup> particles per synaptosome preparations did not associate with uptake of PSD95<sup>+</sup> particles in our assays ( $r_s = -0.20$ ;  $P=0.29$ ). Scale bar 15  $\mu$ m.

### Supplementary Figure 8

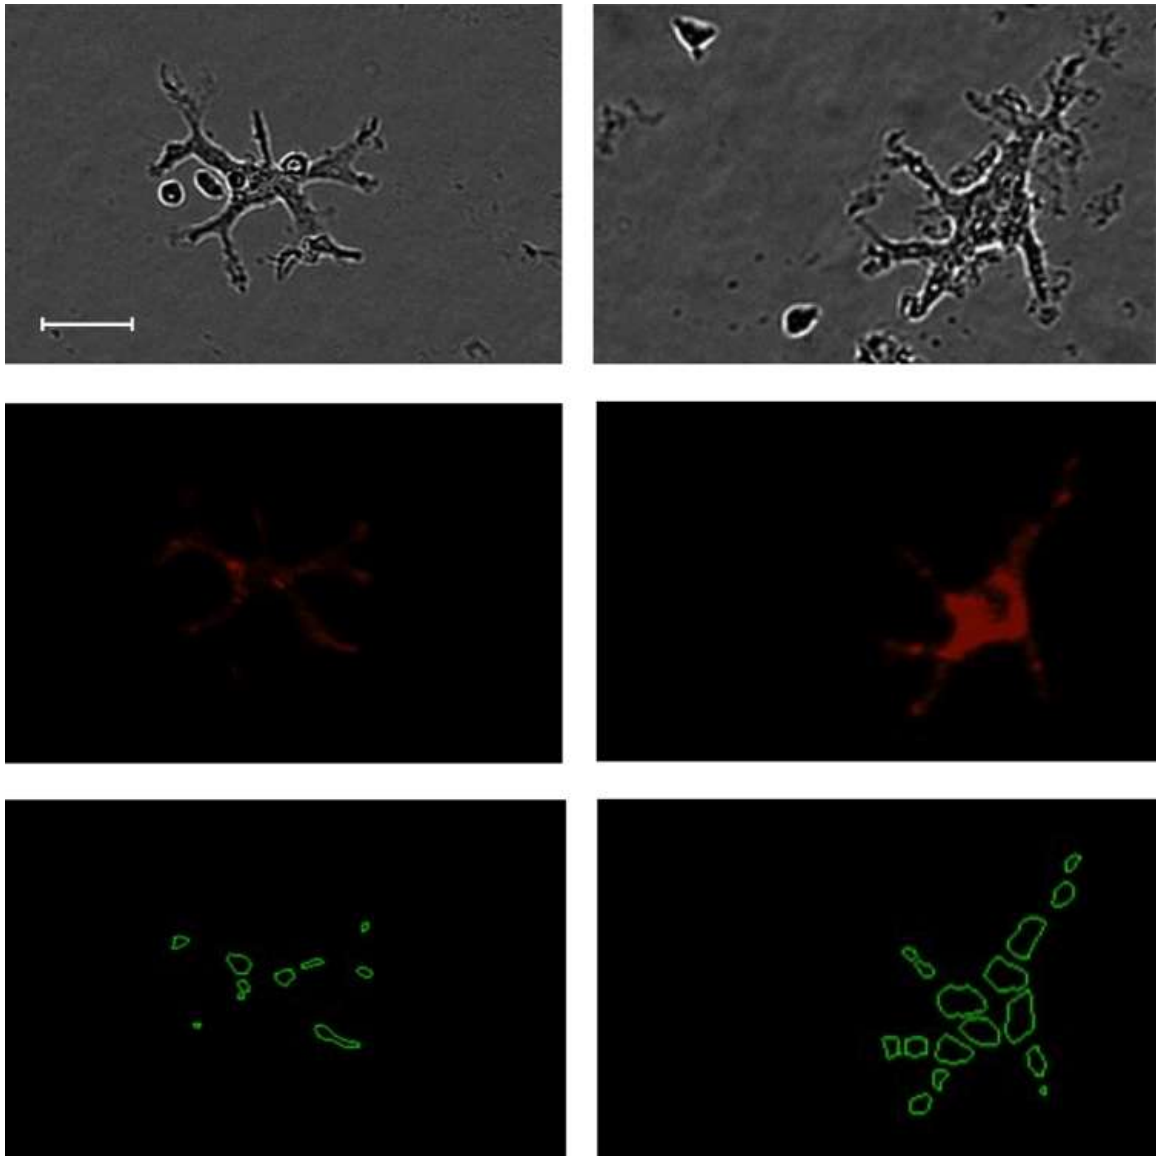

**Supplementary Figure 8.** Examples of pHrodo quantification in live imaging (from experiments described in Figure 3 and 4). Co-localization of phase contrast (top panels) and pHrodo labeling (middle panels) used to make masks (bottom panels) for quantification. Scale bar 20  $\mu\text{m}$ .

## Supplementary Figure 9

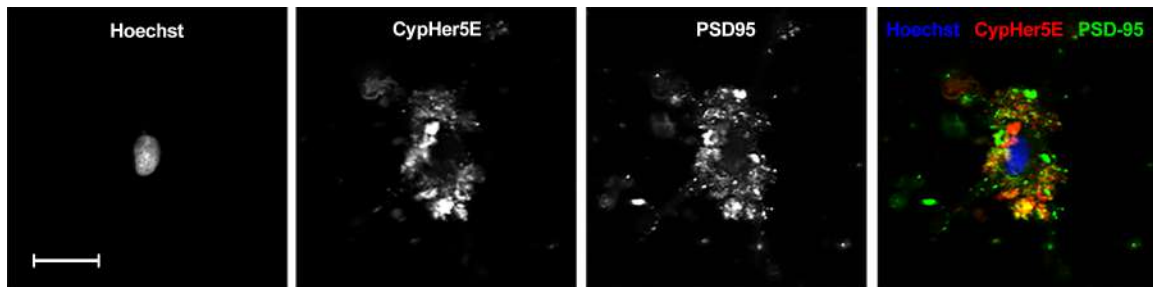

**Supplementary Figure 9.** Co-localization of CypHer5E<sup>TM</sup> and PSD-95<sup>+</sup> puncta (confocal microscopy). Experiments were repeated independently in 2 different subjects (6 cell culture replicates per subject) with similar results. Scale bar 20  $\mu\text{m}$ .

## Supplementary Figure 10

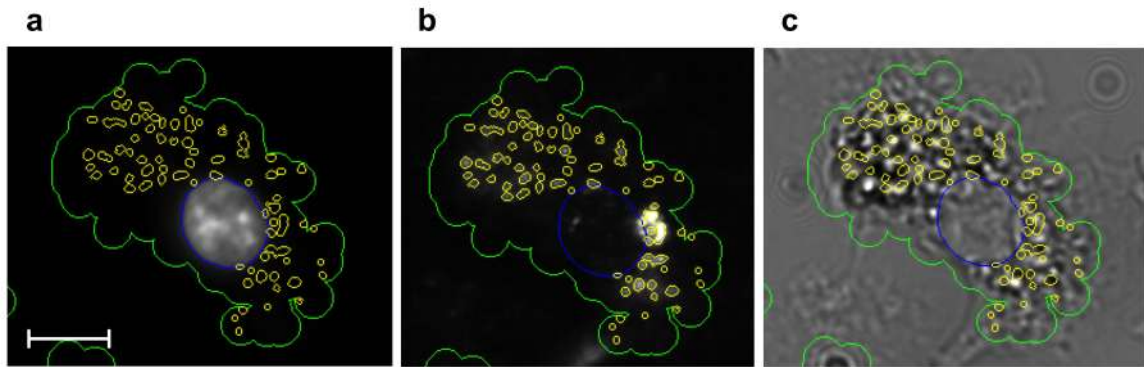

**Supplementary Figure 10.** Example of automated PSD-95<sup>+</sup> puncta quantification using IN Cell Analyzer software (from experiments described in Figure 3 and 4). **(a)** Nuclear staining with software indicating cell outline (green) and PSD-95<sup>+</sup> puncta (yellow). **(b)** PSD-95<sup>+</sup> puncta staining with software indicating nucleus (blue), and cell outline (green). **(c)** Phase contrast image displaying same software indications. Scale bar 15  $\mu\text{m}$ .

## Supplementary Figure 11

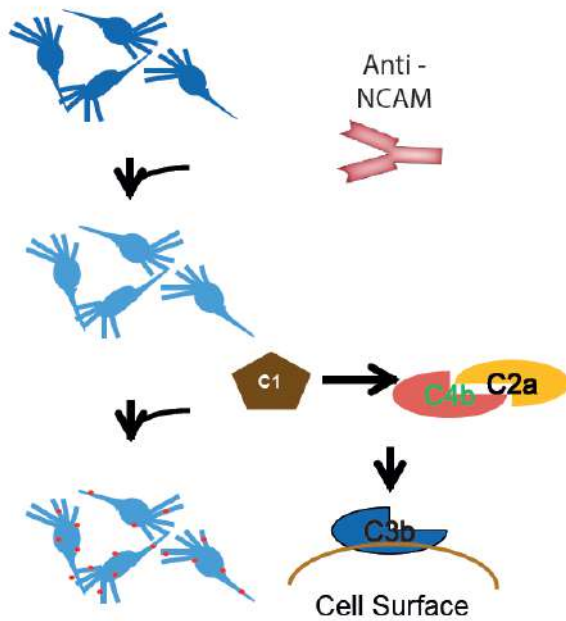

**Supplementary Figure 11.** Schematic of C3 deposition assay. Neuronal cultures are treated with an IgM anti-NCAM antibody to sensitize complement activation. Following antibody treatment, upstream complement components C1, C2 and C3 are supplemented. Because C4 is necessary for complement cascade activation, these conditions test the synthesis of C4 from the neuronal culture. Surface C3 deposition is measured with a fluorescent anti-C3 antibody, and anti-C3 immunofluorescence signal is normalized to anti-NCAM indirect immunofluorescence intensity.

## Supplementary Figure 12

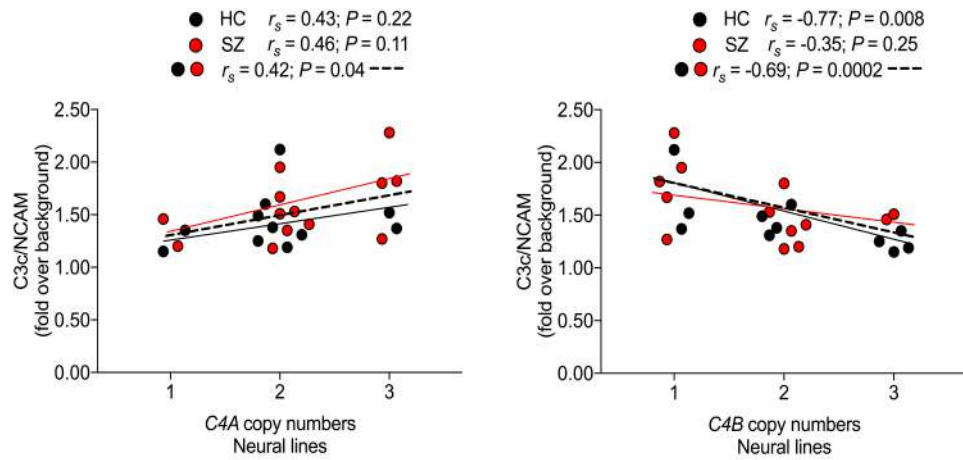

**Supplementary Figure 12.** Complement (C3) deposition on iPSC-derived neurons derived from 13 schizophrenia subjects (red dots) and 11 healthy first-degree relatives of these subjects (black dots) as an effect of *C4A* and *C4B* copy numbers. First, we treated the iPSC-derived neuronal cultures with an IgM anti-NCAM antibody to sensitize complement activation. Following antibody treatment, the upstream complement components C1, C2 and C3 were then supplemented. *C4A* and *C4B* copy numbers displayed a strong inverse correlation in both groups (HC:  $r_s = -0.76$ ,  $P = 0.018$ , SZ:  $r_s = -0.62$ ;  $P = 0.036$ ). Correlation coefficients are Spearman's and p-values are two-sided.

Supplementary Figure 13.

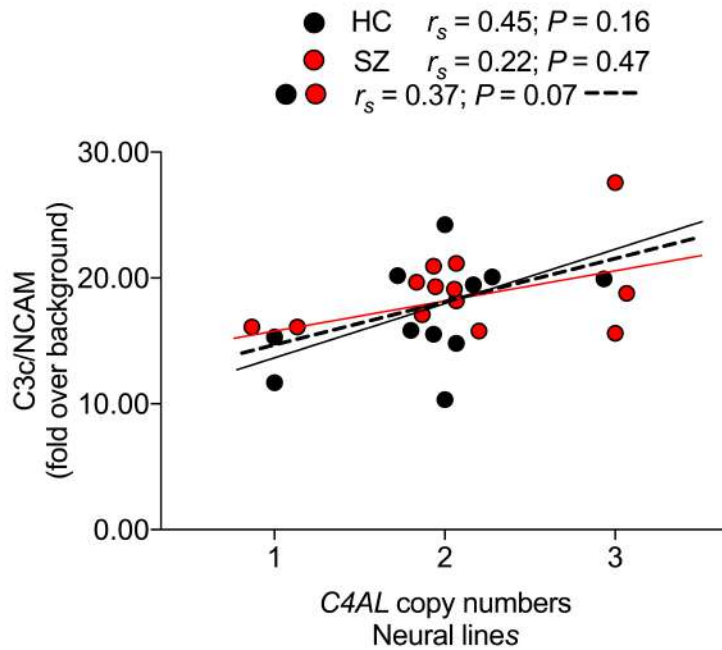

**Supplementary Figure 13.** Complement (C3) deposition (serum) on iPSC-derived neurons derived from 13 schizophrenia subjects (red dots) and 11 healthy first-degree relatives of these subjects (black dots) as an effect of *C4AL* copy numbers. First, we treated the iPSC-derived neuronal cultures with an IgM anti-NCAM antibody to sensitize complement activation. Following antibody treatment, 5 % C5-depleted serum was added. Correlation coefficients are Spearman's and p-values are two-sided.

**Supplementary Figure 14.**

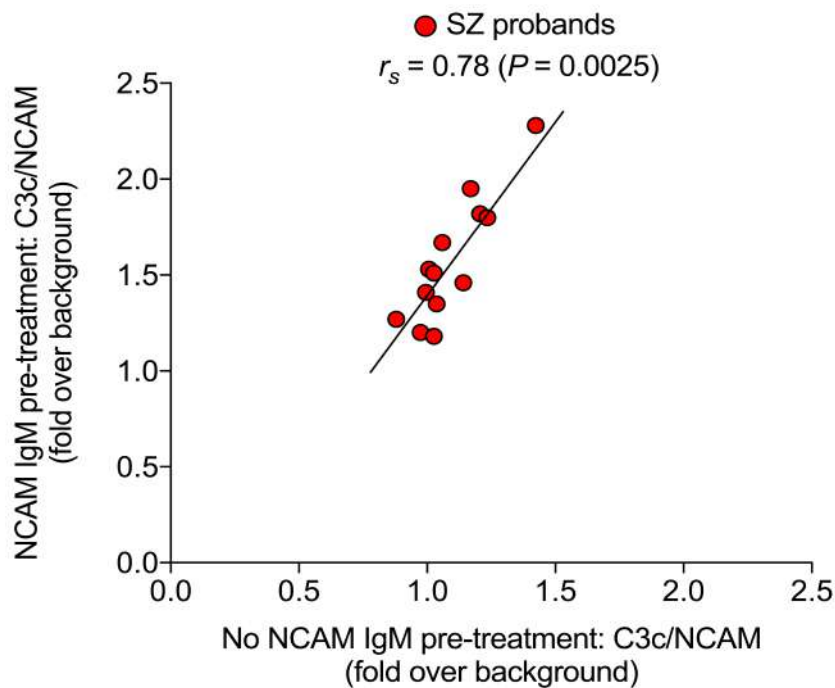

**Supplementary Figure 14.** Complement 3 (C3) deposition on human iPSC-derived neural cultures from 13 individuals with childhood-onset schizophrenia (see also Fig. 5a-d). We observed a strong correlation between C3 deposition with IgM anti-NCAM antibody pre-treatment (y-axis) and without (x-axis) with a more or less identical correlation between neural *C4AL* copy numbers (CN) and neural C3 complement deposition in experiments without IgM anti-NCAM pre-treatment ( $r_s = 0.64$ ;  $P = 0.025$ ) as in experiments using IgM anti-NCAM pre-treatment ( $r_s = 0.64$ ;  $P = 0.017$ , see Fig 5a). Correlation coefficient is Spearman's and p-value is two-sided.



## Supplementary Figure 15.

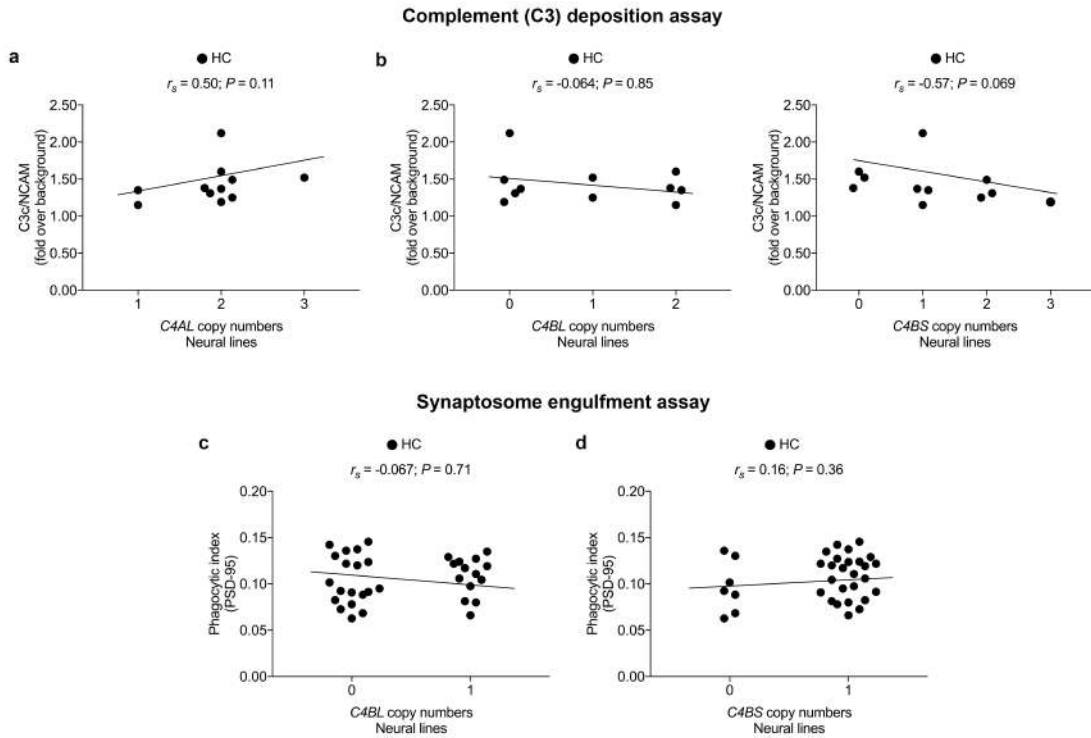

**Supplementary Figure 15. (a) – (b)** Complement (C3) deposition on iPSC-derived neurons derived from 11 healthy first-degree relatives (parents) of schizophrenia probands as an effect of different *C4AL*, *C4BL*, and *C4BS* copy numbers. iPSC-derived neuronal cultures with an IgM anti-NCAM antibody to sensitize complement activation. Following antibody treatment, the upstream complement components C1, C2 and C3 were then supplemented. **(c) – (d)** Phagocytic index (PSD-95+ inclusions) as a result of different *C4BL* and *C4BS* copy numbers among healthy controls contributing with iPSC-derived neural cultures for our synaptosome phagocytosis assay. Correlation coefficients are Spearman's and p-values are two-sided.

### Supplementary Figure 16.

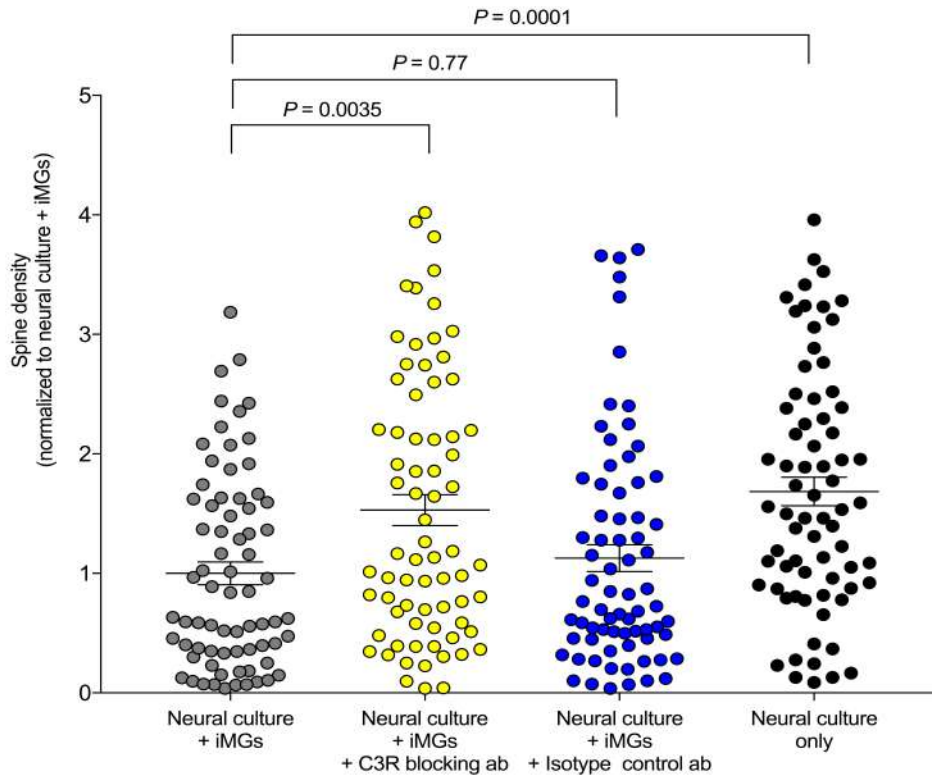

**Supplementary Figure 16.** Dendritic spine density as measured by spines per confocal microscopy image, normalized to counts in neural culture plus + microglia-like cells (iMGs) co-cultures (grey dots), of 2 schizophrenia subjects ( $n = 71$  randomly selected dendrites). Yellow dots ( $n = 72$ ) indicate dendritic spine density in co-cultures derived from same subjects but with pre-treatment using an anti- $\alpha$ M (clone M1/70) antibody in order to inhibit the microglia specific C3 receptor (C3R), while blue dots ( $n = 72$ ) indicate pre-treatment with an isotype control antibody. Black dots ( $n = 72$ ) indicate spine density in neural monocultures derived from same schizophrenia subjects. Error bars represent s.e.m and data was analyzed using an ANOVA ( $F(3,283) = 7.95$ ;  $P < 0.0001$ ) with the two-sided Sidak post test adjusted p-values are indicated in the graph ('neural culture + iMGs' as comparison group).

## Supplementary Figure 17

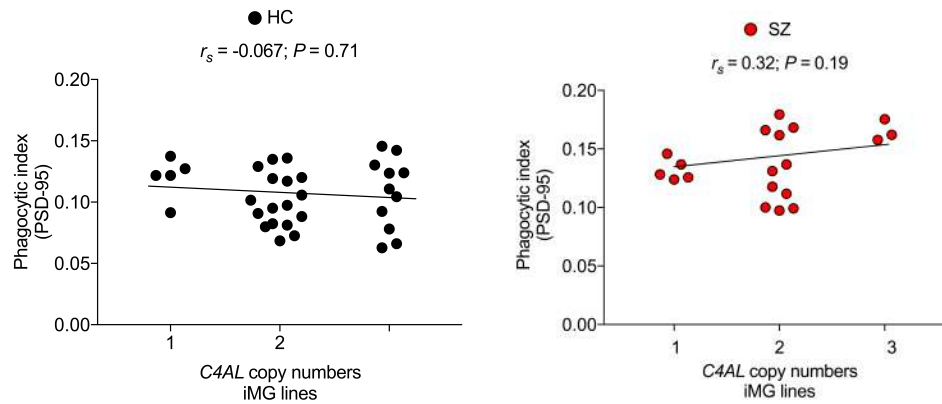

**Supplementary Figure 17.** Phagocytic index (PSD-95+ inclusions) as a result of different *C4AL* copy numbers among healthy controls (HC) and schizophrenia (SZ) subjects contributing with induced microglia-like cells (iMGs) for the synaptosome phagocytosis assay [n (HC – HC) = 33 models, n (SZ – SZ) = 19 models]. Correlation coefficients are Spearman's and p-values are two-sided.

**Supplementary Figure 18.**

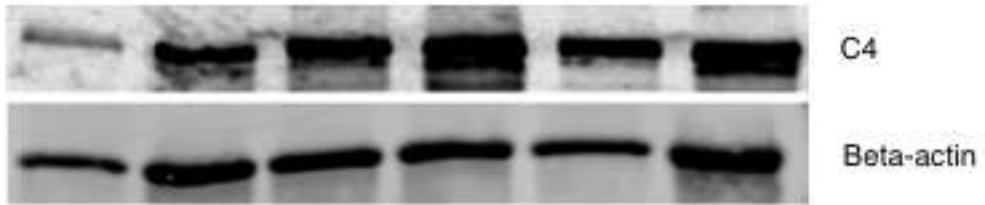

**Supplementary Figure 18.** Western blots of 6 isolated synaptosome preparations showing presence of C4.

## Supplementary Figure 19

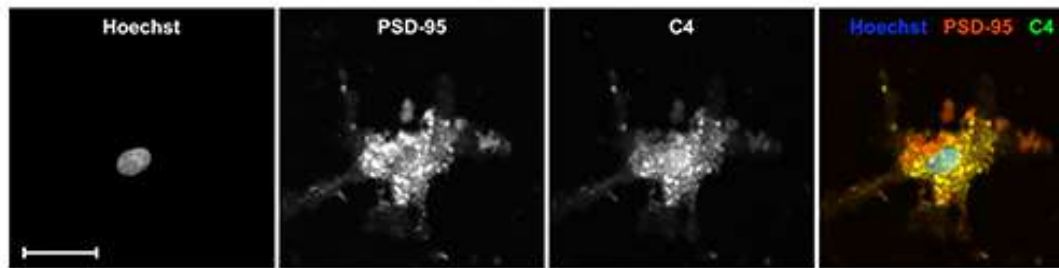

**Supplementary Figure 19.** Representative image of an induced microglia-like cell after treatment with synaptosomes that display co-localization of C4<sup>+</sup> puncta and PSD-95<sup>+</sup> puncta. Experiments were repeated independently in 6 different subjects (3-6 cell culture replicates per subject) with similar results. Scale bar 20  $\mu$ m.

## Supplementary Figure 20

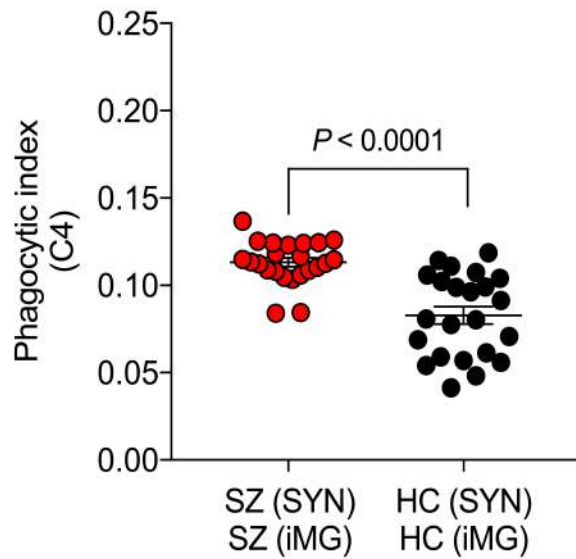

**Supplementary Figure 20.** Quantification (confocal microscopy) of phagocytic inclusions (C4<sup>+</sup> inclusions, 0.5–1.5 $\mu$ m) in induced microglia-like cells (iMG) after exposure to synapstosomes. Red dot display  $n = 23$  schizophrenia (SZ – SZ) models and black dots  $n = 23$  healthy control (HC – HC) models. Data was analyzed using a *t*-test (Welch corrected):  $t$ -test(33.1) = 5.47 and reported p-value is two-sided. Mean  $\pm$  s.e.m is indicated for each group.

**Supplementary Figure 21**

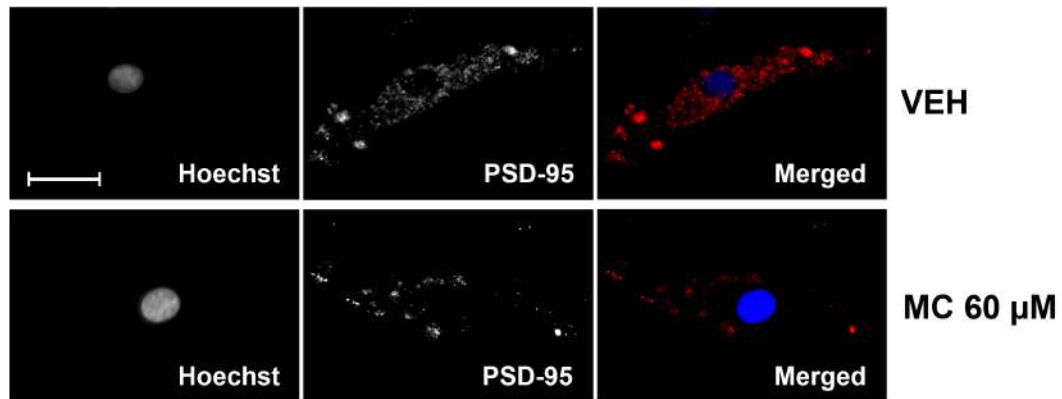

**Supplementary Figure 21.** Representative images displaying PSD-95<sup>+</sup> phagocytic inclusions in iMGs 5.5 h after treatment with vehicle (VEH) or minocycline (MC; 60μM) of live imaging (confocal microscopy) from the experiments described in Figure 6. Scale bar 20 μm.

## Supplementary Figure 22

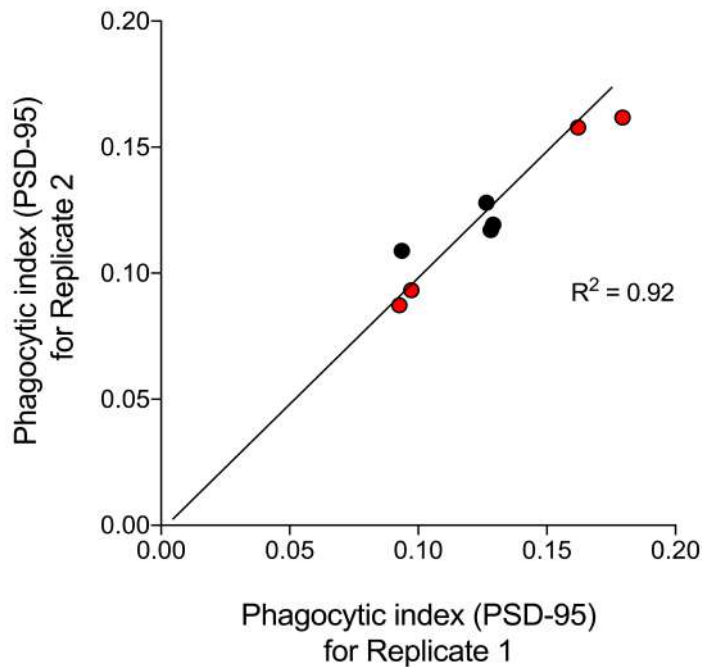

**Supplementary Figure 22.** Within-individual microglial assays in a patient vs. control setting and using different buffy coats. For 8 individuals (4 schizophrenia subjects [red dots] and 4 HCs [black dots]) microglia samples were derived from two different buffy coat samples. Each dot represent a pair of experiments with phagocytic index (PSD-95<sup>+</sup> inclusions, 0.5–1.5 $\mu$ m, per iMG cytosol area) plotted on x-axis and y-axis for each replicate. Correlation between pairs (R-squared; Spearman) of samples was 0.92.



**Supplementary Figure 23.**

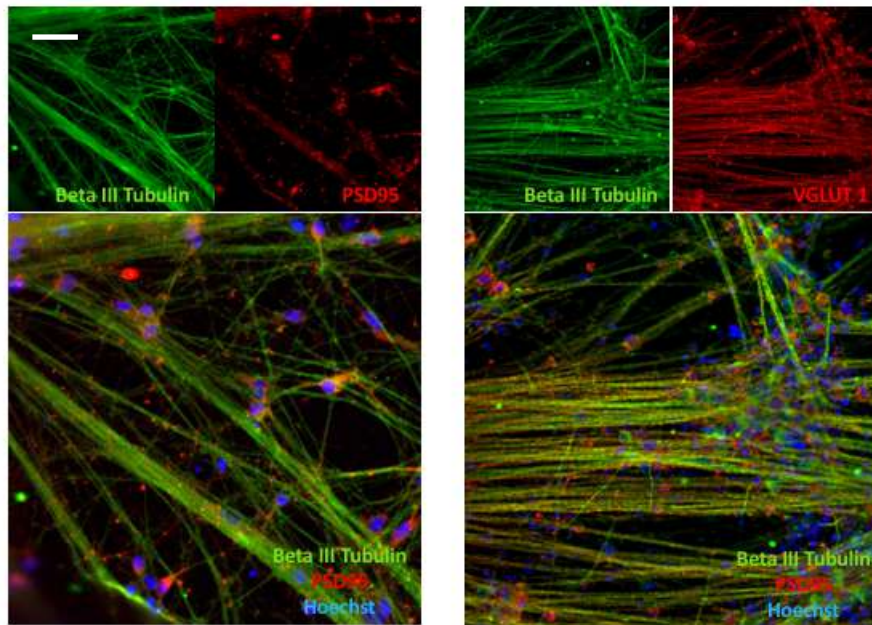

**Supplementary Figure 23.** Characterization of induced *NGN2* neurons used for co-cultures shows that a majority of the neurons are glutamatergic ( $VGLUT1^+$ ) and express the post-synaptic marker PSD-95. Experiments were repeated independently in 3 different subjects (3-6 cell culture replicates per subject) with similar results. Scale bar: 100  $\mu$ m.

**Supplementary Figure 24.**

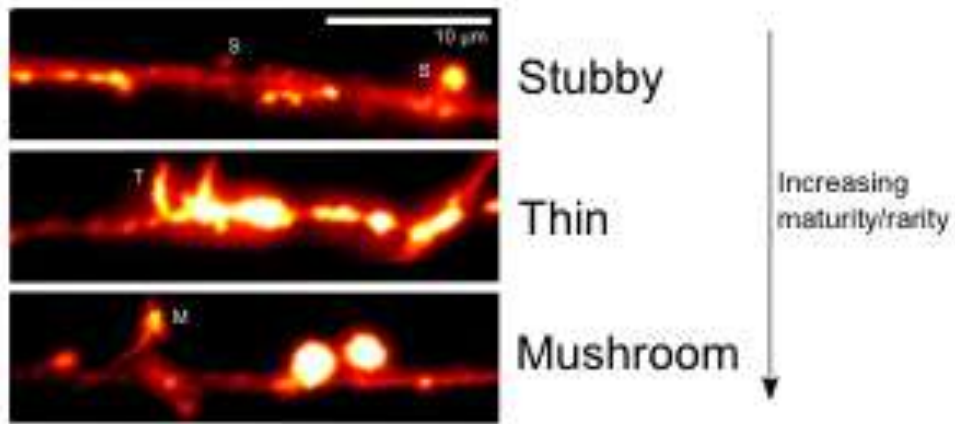

**Supplementary Figure 24.** Spine subtypes in induced *NGN2* neurons. Detailed spine analysis of images generated in experiments described in Figure 3 shows the presence of different sub-type of spines: thin, stubby and mushroom. Scale bar: 10 μm

**Supplementary Table 1. Microglia-specific genes as defined by Bennett, M.L., *et al.* (2016).**

|                            |                     |                                      |                               |                  |
|----------------------------|---------------------|--------------------------------------|-------------------------------|------------------|
| TNFRSF1B; MIR4632; MIR7846 | CD83                | TFPI                                 | NDUFC2-KCTD14; NDUFC2; KCTD14 | CD300A           |
| C1QA                       | MYLIP; MIR4639      | SLC40A1                              | NDUFS3                        | SLC16A3; MIR6787 |
| C1QC                       | SLC16A10            | CMTM7                                | CTSD                          | RTN4RL1          |
| C1QB                       | TREM2               | ITGA9                                | LAG3                          | CXCL16           |
| CD52                       | CD164               | CCR5                                 | NCKAP1L                       | STX8             |
| CSF3R                      | SGK1                | STAB1                                | TPCN1                         | SLC46A1          |
| FAM102B                    | IFNGR1              | CD86                                 | P2RX7                         | ABHD15           |
| CD53                       | SFT2D1              | GP9                                  | ORAI1                         | CCL3             |
| CD53                       | TMEM14C             | GPR160                               | C3AR1                         | CD79B            |
| SCNM1; TNFAIP8L2           | HFE                 | CMTM6                                | LDHB                          | SLC16A6          |
| SLAMF8                     | FSCN1               | DUSP7                                | CMKLR1                        | ABCA9            |
| FCER1G                     | RAPGEF5             | PROS1                                | TMEM119                       | CD68             |
| SFT2D2                     | ELMO1               | B4GALT4                              | SELPLG                        | LGALS9           |
| CFH                        | SGCE                | CD80                                 | ITM2B                         | ITGB3            |
| PTPRC                      | GAL3ST4             | ITGB5                                | LPAR6                         | TTR              |
| SRGAP2                     | LY96                | P2RY13                               | KCTD12                        | TNFRSF11A        |
| CR1L                       | ASPH                | P2RY12                               | GPR183                        | TNFRSF11A        |
| KLHL21                     | LY6E                | LIPH                                 | GAS6                          | LMAN1            |
| SLC2A5                     | LY6E                | UPKB1B                               | PNP                           | GNA15            |
| GPR157                     | TGFBR1              | TLR9                                 | ANG; RNASE4                   | EBI3             |
| CNR2                       | TLR4                | ETV5                                 | EIF2S1                        | TBCB             |
| PTAFR                      | RP11-281A20.2; TLR4 | LAP3                                 | GPR65                         | KCNK6            |
| CSF3R                      | GOLM1               | LAP3                                 | KCNK13                        | CD37             |
| ADORA3; TMIGD3             | ENG                 | SMAD1                                | TMEM55B                       | TYROBP           |
| NOTCH2                     | GPR34               | TLR2                                 | SLC7A7                        | TGFB1            |
| SLC39A1                    | OPHN1               | LOC101928877; RP11-386B13.3; SLC25A4 | SLC7A8                        | LAIR1            |
| DPM3                       | CYSLTR1             | SLC25A4                              | NUMB                          | NDUFA3           |
| FCRL1                      | SLC10A3             | COMMD8                               | LGMN                          | NDUFA3           |
| SLAMF9                     | TSPAN7              | ABCG2                                | ASB2                          | NDUFA7           |
| CD84                       | MRC1                | CTSO                                 | B2M                           | FAM110A          |
| CD48                       | SLC29A3             | TLR1                                 | CD276                         | SIRPA            |
| PVRL4                      | SLC29A3             | TLR1                                 | MPI                           | DYNLRB1          |
| OLFML2B                    | ARHGAP12            | TLR6                                 | TSPAN3                        | SLCO4A1          |
| CD34                       | BLNK                | FAM105A                              | TMEM204                       | SLC17A9          |
| TLR5                       | BLNK                | HEXB                                 | SNN                           | TGM2             |
| DNAJB4                     | RGS10               | CXXC5                                | TNFRSF17                      | SERINC3          |
| OLFML3                     | ENTPD1              | SEPP1                                | IL21R                         | STAU1            |
| PLEKHO1                    | CD81                | MEF2C                                | ITGAM                         | PMEP1            |
| F11R                       | POLR2G              | TMEM173                              | ITGAM                         | IFNGR2           |
| ITPRIPL1                   | FERMT3              | CXXC5                                | DCTPP1                        | IFNGR2           |
| MERTK                      | P2RY6               | CD14                                 | PYCARD                        | ITGB2            |
| TMEM37                     | SLCO2B1             | CSF1R                                | SERPINF1                      | RCAN1            |
| ITGA6                      | THRSP               | CD74                                 | KCTD11                        | ITGB2            |
| CASP8                      | IL10RA              | SPARC                                | TRPV2                         | IFNAR2           |
| SLC11A1                    | UBASH3B             | LTC4S                                | CCL2                          | IL10RB           |
| ADI1                       | SLC37A2             | CD180                                | CCL4L2; CCL4; CCL4L1          | COMT; MIR4761    |
| TGFA                       | COMMD9              | ECSCR                                | TMEM106A                      | CRYBA4           |
| IL1A                       | ACP2                | HAVCR2                               | G6PC3                         | CSF2RB           |
| TMEM185B                   | ACVR1               | SLC15A3                              | ABCC3                         |                  |
| LY86                       | GPR155              | CTSF                                 | TANC2                         |                  |
| OSM                        | PDGFB               | CRYBB1                               | SYNGR1                        |                  |

See Bennett, M.L., *et al.* (New tools for studying microglia in the mouse and human CNS. *Proc Natl Acad Sci U S A* **113**, E1738-1746 (2016)).

**Supplementary Table 2. Microglia-specific genes as defined by Gosselin, D., *et al.* (2017)**

|                                  |                                         |         |                              |                                      |
|----------------------------------|-----------------------------------------|---------|------------------------------|--------------------------------------|
| TNFRSF1B;<br>MIR4632;<br>MIR7846 | ARHGAP15                                | USP53   | C2                           | VSIG4                                |
| RSC1A1; DDI2                     | DHRS9                                   | TLR2    | SERPINB9                     | EDA2R                                |
| C1QA                             | ANKRD44                                 | TLR3    | LOC100130357;<br>RP1-257A7.4 | IL2RG                                |
| C1QC                             | CASP10                                  | CYTL1   | HLA-DRB1                     | RP5-1091N2.9; IL2RG                  |
| C1QB                             | CASP8                                   | SLC2A9  | HLA-DMB                      | CYSLTR1                              |
| NCMAP                            | CTLA4                                   | TLR10   | HLA-DMA                      | BTK                                  |
| RPS6KA1                          | SLC11A1                                 | TMEM156 | FAM46A                       | ELF4                                 |
| RPS6KA1                          | CCL20                                   | RBM47   | RNASET2                      | ELF4                                 |
| THEMIS2                          | SP140                                   | PLAC8   | SCIN                         | ATP11C                               |
| CSF3R                            | SP140L                                  | HPSE    | MYO1G                        | GAB3                                 |
| ZC3H12A;<br>MIR6732              | SP100                                   | HPGDS   | IKZF1                        | ARHGAP4                              |
| PLK3                             | INPP5D                                  | TIFA    | LAT2                         | TMEM236                              |
| BTBD19                           | NLRC4                                   | MAML3   | NCF1                         | MRC1                                 |
| CCDC18                           | OXER1                                   | MAML3   | PIK3CG                       | PLXDC2                               |
| CD53                             | ZFP36L2                                 | TMEM154 | CPED1                        | OTUD1                                |
| CD53                             | LOC100506142;<br>RP11-417F21.1;<br>RHOQ | TIGD4   | IRF5                         | APBB1P                               |
| C1orf162                         | PUS10                                   | ZNF141  | TBXAS1                       | MAP3K8                               |
| WNT2B                            | M1AP                                    | ZNF141  | TAS2R5                       | ALOX5                                |
| TTF2                             | MGAT4A                                  | TLR1    | GIMAP8                       | ALOX5                                |
| NBPF8                            | IL1A                                    | TLR1    | GIMAP2                       | WDFY4                                |
| FCGR1B                           | IL1B                                    | TLR6    | CARD11                       | TIMM23B                              |
| FCGR1A                           | TFCP2L1                                 | GPRIN3  | IGF2BP3                      | PALD1                                |
| HIST2H2AC                        | CYTIP                                   | DDX60L  | CPVL                         | PLAU                                 |
| ADAMTSL4                         | LY75-CD302;<br>CD302; LY75              | DDX60L  | AOAH                         | STAMBPL1                             |
| IL6R                             | DPP4                                    | FAM105A | MYO1G                        | BTAF1                                |
| CD1D                             | DPP4                                    | PTGER4  | FGL2                         | HHEX                                 |
| MNDA                             | ANKRD44                                 | CARD6   | ABCB4                        | SFXN2                                |
| IFI16                            | SP110                                   | GAPT    | SAMD9                        | NHLRC2                               |
| HSPA6                            | HTR2B                                   | F2RL1   | SAMD9L                       | VENTX                                |
| DUSP27                           | REL                                     | S100Z   | GAL3ST4                      | SFMBT2                               |
| SFT2D2                           | IL1RN                                   | ERAP2   | PIK3CG                       | LOC102724323; RP11-67C2.2;<br>MARCH8 |
| TBX19                            | NABP1                                   | LNPEP   | CREB3L2                      | C10orf128                            |
| C1orf112                         | ASXL2                                   | ADRB2   | CLEC5A                       | EGR2                                 |
| FMO4                             | SNORD89;<br>RNF149                      | DOCK2   | ZNRF2                        | C10orf55                             |
| ZBTB37                           | RNF149                                  | C5orf58 | TFEC                         | ANKRD22                              |
| SOAT1                            | FANCD2                                  | FYB     | TFEC                         | CH25H                                |
| MR1                              | IRAK2                                   | ANXA2R  | TNFRSF10C                    | MYOF                                 |
| NPL                              | TGFBR2                                  | EMB     | ADAM28                       | BLNK                                 |
| OCLM                             | CMTM7                                   | NAIP    | POMK                         | BLNK                                 |
| OCLM                             | ITGA9                                   | LHFPL2  | LY96                         | PIK3AP1                              |
| PLA2G4A                          | DLEC1                                   | LNPEP   | MYC                          | FFAR4                                |
| RGS18                            | CCR5                                    | ST8SIA4 | DENND3                       | CC2D2B                               |
| RGS1                             | CCRL2                                   | TMEM173 | DENND3                       | IL15RA                               |
| RGS2                             | FAM212A                                 | CD14    | PPP1R3B                      | AGAP5                                |
| PTPRC                            | UBA7                                    | CSF1R   | FGF20                        | KCNQ1                                |
| IKBKE                            | RASSF1-AS1                              | HAVCR1  | FGL1                         | SLC22A18                             |
| TRAF3IP3                         | STAB1                                   | DOCK2   | REEP4                        | OR52N4                               |
| HLX                              | KBTBD8                                  | KCNMB1  | TNFRSF10B                    | RASSF10                              |
| FAM177B                          | EBLN2                                   | HK3     | TNFRSF10D                    | PDE3B                                |
| DISP1                            | ADPRH                                   | DOK3    | TNFRSF10A                    | PDE3B                                |
| NLRP3                            | CD86                                    | DAB2    | ADAM28                       | TMEM86A                              |
| CFAP74                           | PARP15                                  | DAB2    | RNF122                       | PRRG4                                |
| SLC2A5                           | PARP14                                  | CD180   | PLAG1                        | PTPRJ                                |
| IFNLR1                           | KBTBD12                                 | NAIP    | PAG1                         | FAM111A                              |

|                   |               |                                  |                        |                       |
|-------------------|---------------|----------------------------------|------------------------|-----------------------|
| PTAFR             | ACPP          | RAPGEF6                          | DPYS                   | MS4A4A                |
| LAPTM5            | SUCNR1        | HAVCR2                           | SLA                    | FERMT3                |
| COL8A2            | GPR160        | LCP2                             | MSR1                   | CCDC88B               |
| CSF3R             | SKIL          | LY86                             | MSR1                   | CABP4                 |
| TCTEX1D4          | B3GNT5        | RREB1                            | DOCK8                  | FOLR2                 |
| FRRS1             | ST6GAL1       | GCNT2                            | JAK2                   | P2RY6                 |
| DENND2D           | IL1RAP        | CD83                             | JAK2                   | SLCO2B1               |
| ADORA3;<br>TMIGD3 | IL1RAP        | TRIM38                           | CD274                  | MYO7A                 |
| SYT6              | LRCH3         | HIST1H2BF                        | PDCD1LG2               | RAB39A                |
| CD58              | FAM157A       | HIST1H4E                         | MAMDC2                 | ATM                   |
| SRGAP2B           | GHRL          | HIST1H2AE                        | SYK                    | IL10RA                |
| HIST2H2BF         | SLC4A7        | MICB                             | FGD3                   | SORL1                 |
| HIST2H2AB         | CMTM6         | TNF                              | SUSD3                  | SLC37A2               |
| CTSS              | GLB1; TMPPE   | MSH5; MSH5-<br>SAPCD1;<br>SAPCD1 | TGFBR1                 | KCNJ5                 |
| IL6R              | XIRP1         | HSPA1A;<br>HSPA1B                | TLR4                   | ST14                  |
| CD84              | CX3CR1        | HSPA1B;<br>HSPA1A                | RP11-281A20.2;<br>TLR4 | LMNTD2                |
| ARHGAP30          | CDCP1         | HLA-DRA                          | CNTRL                  | TRIM22                |
| FCGR3A            | CCR1          | HLA-DQA1                         | PTGS1                  | LYVE1                 |
| FCGR3B            | UBA7; MIR5193 | DEF6                             | C9orf106               | SPI1                  |
| OLFML2B           | CISH          | FGD2                             | TOR4A                  | MPEG1                 |
| SELL              | WNT5A         | PTCRA                            | C9orf66                | MS4A6A                |
| SELL              | WNT5A         | RUNX2                            | BNC2                   | UNC93B1               |
| TNFSF18           | HCLS1         | PRDM1                            | HACD4                  | KCNE3                 |
| NCF2              | DZIP1L        | TNFAIP3                          | B4GALT1                | RAB38                 |
| FAM129A           | P2RY13        | STX11                            | ZCCHC6                 | CTSC                  |
| PTGS2             | P2RY12        | SUMO4                            | SYK                    | CASP4                 |
| NUAK2             | IGSF10        | SYTL3                            | FBP1                   | IL18                  |
| IL10              | PLD1          | HIST1H3D;<br>HIST1H2AD           | ABCA1                  | SORL1                 |
| TLR5              | PLD1          | HIST1H2BG                        | TNFSF8                 | C11orf45              |
| ZNF124            | KLHL6         | IER3                             | ZBTB26                 | TRIM34                |
| OLFML3            | P3H2          | HLA-DRB5                         | GBGT1                  | TRIM6-TRIM34          |
| FCGR2A            | ACKR2         | HLA-DQB1                         | CARD9                  | TRIM22                |
| FCGR2C            | ZNF660        | HLA-DOA                          | TLR7                   | MS4A7                 |
| IER5              | NFKBIZ        | HLA-DPA1                         | TLR8                   | MS4A14                |
| MKNK1             | NRROS         | DEF6                             | CYBB                   | TCIRG1                |
| TAL1              | ZNF141        | FKBP5                            | GPR34                  | FUT4                  |
| ADAMTSL4-AS1      | SH3TC1        | TREML1                           | WAS                    | BCO2; RPS12P21        |
| EML4              | N4BP2         | TREM2                            | CLCN5                  | CASP1                 |
| PLEK              | RHOH          | PLA2G7                           | ATP7A                  | CD4                   |
| ARHGAP25          | CEP135        | MB21D1                           | DIAPH2                 | PTPN6                 |
| HK2               | CXCL8         | VNN2                             | DOCK11                 | CLEC2D                |
| ITPRIPL1          | BMP2K         | SGK1                             | IL13RA1                | TMEM52B               |
| STEAP3            | SPP1          | IFNGR1                           | SOWAHD                 | PLBD1                 |
| KYNU              | MMRN1         | ZC3H12D                          | SASH3                  | KIAA1551              |
| ARHGAP15          | DAPP1         | TAGAP                            | STK26                  | PCED1B                |
| ARHGAP15          | ALPK1         | HFE                              | CXorf21                | NCKAP1L               |
| IRAK3; MIR6502    | LPCAT2        | LOC100129083;<br>CTD-2616J11.2   | TYMP; SCO2             | RYR1                  |
| LYZ               | CAPNS2        | FPR2                             | ODF3B                  | CYP2S1                |
| GLIPR1            | NLRC5         | KIR3DX1                          | RPS6KA1                | FOSB                  |
| SH2B3             | ADGRG5        | FCAR                             | RPS6KA1                | C5AR2                 |
| SH2B3             | PLCG2         | ZNF460                           | ZNF660                 | CD37                  |
| EP400NL           | IRF8          | C19orf35                         | RPS6KA1                | RCN3                  |
| CACNA2D4          | IGSF6         | TMIGD2                           | RPS6KA1                | SIGLEC16              |
| LPAR5             | SPN           | ARRDC5                           | RPS6KA1                | SIGLEC9               |
| ACRBP             | C16orf54      | DENND1C                          | RPS6KA1                | SIGLEC7               |
| C3AR1             | SNX20         | C3                               | ZNF660                 | CD33                  |
| A2M               | FHOD1         | PRAM1                            | INPP5D                 | IL4R                  |
| CD69              | DPEP2         | MYO1F                            | RPS6KA1                | APOBR                 |
| CLEC7A            | ZFHX3         | ZNF121                           | RPS6KA1                | AC009133.17; C16orf54 |

|                                    |                                            |                       |                              |                    |
|------------------------------------|--------------------------------------------|-----------------------|------------------------------|--------------------|
| OLR1                               | MLKL                                       | LYL1                  | INPP5D                       | ITGAL              |
| PLBD1                              | MAF                                        | ADGRE2                | INPP5D                       | PYCARD-AS1         |
| ERP27                              | ITPRIPL2                                   | RASAL3                | RPS6KA1                      | ITGAM              |
| BHLHE41                            | SPN                                        | PLVAP                 | INPP5D                       | ITGAM              |
| FAM60A                             | LOC100506388;<br>RP11-1260E13.4;<br>hosaru | JAK3                  | RPS6KA1                      | ITGAX              |
| BIN2                               | SERPINF2                                   | IL12RB1               | RPS6KA1                      | ZNF267             |
| ITGB7                              | SPNS3                                      | LRRC25                | INPP5D                       | ADCY7              |
| GPR84                              | ZMYND15                                    | LPAR2                 | RPS6KA1                      | PARV7              |
| ARHGAP9                            | USP6                                       | GMIP                  | FCGBP                        | CECR1              |
| POC1B; POC1B-<br>GALNT4;<br>GALNT4 | CCL4L2; CCL4;<br>CCL4L1                    | ZNF100                | INPP5D                       | CHEK2              |
| IKBIP                              | CCL4L2; CCL4L1                             | CEBPA                 | ZNF660                       | OSM                |
| CMKLR1                             | STAT5A                                     | NFKBID                | INPP5D                       | TNFRSF13C; MIR378I |
| TMEM119                            | TMEM106A                                   | RASGRP4               | INPP5D                       | NAGA               |
| SELPLG                             | ABI3                                       | MAP4K1                | RPS6KA1                      | NFAM1              |
| CLEC4A                             | MRC2                                       | FCGBP                 | INPP5D                       | APOBEC3C           |
| LRMP                               | MILR1                                      | PLAUR                 | RPS6KA1                      | APOBEC3F           |
| LRMP                               | CD300A                                     | SLC1A5                | INPP5D                       | APOBEC3G           |
| HELB                               | SLC16A5                                    | SIGLEC10              | RPS6KA1                      | BCL2A1             |
| OAS1                               | AANAT                                      | SIGLEC8               | RPS6KA1                      | IL16               |
| FMNL3                              | TMC8                                       | SIGLEC14;<br>SIGLEC5  | RPS6KA1                      | IL16               |
| SPATA13;<br>C1QTNF9                | CARD14                                     | FPR1                  | INPP5D                       | STARD5             |
| ALOX5AP                            | RNF213                                     | ZNF888                | RPS6KA1                      | STARD5             |
| LRCH1                              | SLC16A3;<br>MIR6787                        | OSCAR                 | INPP5D                       | MSLN               |
| ARL11                              | CXCL16                                     | LAIR1                 | INPP5D                       | TNFRSF12A          |
| TNFSF13B                           | SCIMP                                      | TMEM150B              | ZNF660                       | CIITA              |
| ELF1                               | NLRP1                                      | STXBP2                | INPP5D                       | CLEC19A            |
| ELF1                               | ASGR2                                      | CEACAM21              | RPS6KA1                      | ACSM5              |
| ELF1                               | PIK3R6                                     | APOC4                 | RPS6KA1                      | GRIK1-AS2; BACH1   |
| ELF1                               | PIK3R5                                     | APOC2                 | C19orf38                     | RUNX1              |
| EPSTI1                             | TVP23C; CDRT4;<br>TVP23C-CDRT4             | APOC4-APOC2;<br>APOC2 | LYL1                         | RUNX1              |
| LCP1                               | ABHD15                                     | C5AR1                 | CLEC17A                      | RUNX1              |
| LPAR6                              | SSH2                                       | C5AR1                 | MVB12A; BISPR                | IL17RA             |
| KCTD12                             | EVI2A; EVI2B                               | ZNF808;<br>RPL39P34   | COLGALT1                     | HMOX1              |
| ABCC4                              | SLFN12                                     | LILRA2                | PIK3R2; IFI30                | NCF4               |
| GPR183                             | CCL3                                       | LILRA1                | ZNF90                        | CSF2RB             |
| TNFSF13B                           | CCL3L3; CCL3L1                             | LILRB1                | ZNF85                        | CYTH4              |
| TMEM255B                           | ARL5C                                      | LILRB4                | HAMP                         | CCDC134            |
| ANG; RNASE4                        | ARHGAP27                                   | LILRB4                | KCNK6                        | CD93               |
| RNASE6                             | NGT2                                       | ZNF846                | RTTN                         | NFATC2             |
| RNASE3                             | ERN1                                       | ZNF846                | RNF125                       | ZNF217             |
| RNASE2                             | CD300LB                                    | RGL3                  | LOC100505549;<br>RP11-35G9.3 | SIRPB2             |
| RPGRIP1                            | CD300C                                     | NUP62; IL4I1          | DSC2                         | SIRPB1             |
| MMP14                              | CD300LF                                    | SIGLEC11              | ARID3A                       | MX2                |
| TSSK4                              | RHBDF2                                     | ZNF600                | EBI3                         | ITGB2              |
| SUSD6                              | CEP295NL; TIMP2                            | ZNF816-<br>ZNF321P    | UHRF1                        | SAMSN1             |
| GPR65                              | CD68                                       | ZNF321P               | VAV1                         | ITGB2              |
| KCNK13                             | ADAP2                                      | ZNF816                | MYO1F                        | BACH1              |
| PLD4                               | ITGB3                                      | LILRB3                | MYO1F                        | LIPC               |
| TEP1                               | CLDN7                                      | LILRA6                | LRRK1                        |                    |
| SLC7A7                             | RNFT1                                      | LILRB2                | CYFIP1                       |                    |
| MIS18BP1                           | TBC1D3P1-<br>DHX40P1                       | LILRA4                | BMF                          |                    |
| PYGL                               | LIPG                                       | SPTLC3                | PLCB2                        |                    |
| PROX2                              | TNFRSF11A                                  | HCK                   | PATL2                        |                    |
| SERPINA1                           | TNFRSF11A                                  | TLDC2                 | ATP8B4                       |                    |

|               |         |           |         |  |
|---------------|---------|-----------|---------|--|
| GPR132        | SOCS6   | CASS4     | SPPL2A  |  |
| LTB4R; LTB4R2 | PSTPIP2 | C20orf197 | ADPGK   |  |
| RIPK3         | CD226   | SLC17A9   | TBC1D2B |  |

See Gosselin, D., *et al.* (An environment-dependent transcriptional network specifies human microglia identity. *Science* **356** (2017)).

**Supplementary Table 3. Genes upregulated in induced microglia-like cells (iMGs) vs. monocytes.**

| <b>Microglial genes from Bennett et al. 2016</b>                          |                    |                            |                                |                            |
|---------------------------------------------------------------------------|--------------------|----------------------------|--------------------------------|----------------------------|
| <b>Microglial genes from Gosselin et al. 2017</b>                         |                    |                            |                                |                            |
| <b>Microglial genes from Bennett et al. 2016 and Gosselin et al. 2017</b> |                    |                            |                                |                            |
| <b>Gene Symbol</b>                                                        | <b>Fold Change</b> | <b>P-value<sup>1</sup></b> | <b>FDR P-value<sup>2</sup></b> | <b>Affymetrix Probe ID</b> |
| A2M                                                                       | 4126,69            | 1,35E-09                   | 2,63E-06                       | TC0400008091.hg.1          |
| ABCC3                                                                     | 3427,2             | 2,25E-10                   | 1,20E-06                       | TC1000006911.hg.1          |
| ACP2                                                                      | 2149,99            | 7,52E-09                   | 6,72E-06                       | TC1400008705.hg.1          |
| ADAP2                                                                     | 1436,85            | 8,79E-11                   | 9,42E-07                       | TC2000007514.hg.1          |
| ALOX5AP                                                                   | 1329,46            | 2,79E-08                   | 1,46E-05                       | TC0700006913.hg.1          |
| ANKRD22                                                                   | 1231,06            | 3,50E-07                   | 5,44E-05                       | TC1000006912.hg.1          |
| ASPH                                                                      | 1126,9             | 2,05E-07                   | 4,02E-05                       | TC1900011759.hg.1          |
| ATP8B4                                                                    | 1059,16            | 5,75E-10                   | 1,77E-06                       | TC1000010273.hg.1          |
| BHLHE41                                                                   | 903,97             | 3,71E-10                   | 1,59E-06                       | TC1700009850.hg.1          |
| BLNK                                                                      | 868,71             | 7,94E-09                   | 6,81E-06                       | TC0300014082.hg.1          |
| BMP2K                                                                     | 791,48             | 5,27E-07                   | 6,69E-05                       | TC1700007557.hg.1          |
| C1QA                                                                      | 776,12             | 1,29E-09                   | 2,63E-06                       | TC2000009250.hg.1          |
| C1QB                                                                      | 769,22             | 2,60E-08                   | 1,46E-05                       | TC1100008453.hg.1          |
| C1QC                                                                      | 647,07             | 2,89E-06                   | 0,0002                         | TC1900008669.hg.1          |
| C2                                                                        | 634,47             | 2,74E-08                   | 1,46E-05                       | TC0500010615.hg.1          |
| C3                                                                        | 589,68             | 4,37E-08                   | 1,93E-05                       | TC1700007561.hg.1          |
| C3AR1                                                                     | 522,06             | 2,30E-08                   | 1,40E-05                       | TC0100016983.hg.1          |
| CASP8                                                                     | 482,62             | 4,10E-08                   | 1,87E-05                       | TC1800007850.hg.1          |
| CCL2                                                                      | 457,71             | 0,0001                     | 0,0017                         | TC0100018551.hg.1          |
| CCL3                                                                      | 448,53             | 5,35E-06                   | 0,0003                         | TC0700012849.hg.1          |
| CCL3L3;<br>CCL3L1                                                         | 445,75             | 6,84E-09                   | 6,38E-06                       | TC1200012749.hg.1          |
| CCR1                                                                      | 355                | 7,03E-07                   | 7,73E-05                       | TC1400008606.hg.1          |
| CCR5                                                                      | 310,04             | 2,10E-09                   | 3,36E-06                       | TC0100010269.hg.1          |
| CD14                                                                      | 287,66             | 5,27E-05                   | 0,0011                         | TSUnmapped00000392.hg.1    |
| CD274                                                                     | 287,44             | 6,07E-06                   | 0,0003                         | TC1400010012.hg.1          |
| CD53                                                                      | 283,82             | 0,0003                     | 0,0041                         | TC1100012134.hg.1          |
| CD84                                                                      | 255,5              | 1,05E-06                   | 9,49E-05                       | TC2000008279.hg.1          |
| CDCP1                                                                     | 233,94             | 3,05E-09                   | 3,44E-06                       | TC0100014014.hg.1          |
| CECR1                                                                     | 229,64             | 9,97E-08                   | 3,19E-05                       | TC1200009847.hg.1          |
| CH25H                                                                     | 215                | 7,82E-07                   | 8,18E-05                       | TC0100014276.hg.1          |
| CLEC5A                                                                    | 200,37             | 9,50E-07                   | 9,20E-05                       | TC0100013369.hg.1          |
| CMKLR1                                                                    | 197,23             | 3,00E-08                   | 1,52E-05                       | TC0200010545.hg.1          |
| CSF1R                                                                     | 178,67             | 9,96E-08                   | 3,19E-05                       | TC0200007296.hg.1          |
| CSF3R                                                                     | 169,94             | 2,26E-07                   | 4,25E-05                       | TC0300013520.hg.1          |



|          |        |          |          |                         |
|----------|--------|----------|----------|-------------------------|
| CXCL8    | 157,87 | 5,42E-06 | 0,0003   | TC0800012389.hg.1       |
| CYTIP    | 138,45 | 2,85E-09 | 3,44E-06 | TC1400010616.hg.1       |
| DAB2     | 122,79 | 2,37E-09 | 3,39E-06 | TC1000011585.hg.1       |
| DENND3   | 121,92 | 4,43E-07 | 6,20E-05 | TC0100016199.hg.1       |
| EGR2     | 120,56 | 2,84E-06 | 0,0002   | TC0X00009911.hg.1       |
| ELF1     | 115,99 | 7,01E-08 | 2,64E-05 | TC0600012434.hg.1       |
| ELF4     | 113,61 | 2,84E-06 | 0,0002   | TC1100013161.hg.1       |
| ERN1     | 112,1  | 1,89E-07 | 4,02E-05 | TC0200015578.hg.1       |
| ETV5     | 108,92 | 1,22E-07 | 3,37E-05 | TC0600011953.hg.1       |
| FAM46A   | 105,54 | 5,39E-06 | 0,0003   | TC1000008643.hg.1       |
| FBP1     | 104,86 | 9,94E-08 | 3,19E-05 | TC0300007437.hg.1       |
| FCAR     | 104,65 | 0,0012   | 0,0102   | TC1500009738.hg.1       |
| FCGBP    | 102,99 | 1,29E-05 | 0,0004   | TC1200011838.hg.1       |
| FCGBP    | 102,51 | 6,68E-10 | 1,77E-06 | TC0100009364.hg.1       |
| FCGR1A   | 98,01  | 2,40E-06 | 0,0002   | TC0700013471.hg.1       |
| FCGR3A   | 97,74  | 0,0009   | 0,0079   | TC0100016952.hg.1       |
| FCGR3B   | 92,09  | 7,89E-06 | 0,0003   | TC1900009443.hg.1       |
| FOLR2    | 89,08  | 1,63E-05 | 0,0005   | TC0X00007039.hg.1       |
| FOSB     | 89,05  | 0,0005   | 0,0051   | TC1000011376.hg.1       |
| G6PC3    | 88,6   | 5,04E-09 | 5,02E-06 | TC0100011953.hg.1       |
| GPR34    | 79,97  | 3,87E-09 | 4,15E-06 | TC1600009683.hg.1       |
| HLA-DQA1 | 79,32  | 3,41E-06 | 0,0002   | TC1800008285.hg.1       |
| HPGDS    | 77,88  | 2,97E-09 | 3,44E-06 | TC1600010752.hg.1       |
| IER5     | 75,45  | 7,24E-07 | 7,84E-05 | TC0200013265.hg.1       |
| IGSF6    | 74,27  | 1,03E-08 | 8,22E-06 | TC0400010465.hg.1       |
| IL10RA   | 72,96  | 4,69E-05 | 0,001    | TC0100007292.hg.1       |
| INPP5D   | 72,75  | 0,0001   | 0,0019   | TC0100007291.hg.1       |
| IRF8     | 70,72  | 0,0009   | 0,008    | TC1600007235.hg.1       |
| ITGB3    | 67,22  | 7,22E-06 | 0,0003   | TC1200011845.hg.1       |
| LAIR1    | 66,8   | 0,0054   | 0,0316   | TC0600007377.hg.1       |
| LGMN     | 64,79  | 2,88E-07 | 4,84E-05 | TC0300014095.hg.1       |
| LHFPL2   | 64,7   | 1,61E-05 | 0,0005   | TC0100010100.hg.1       |
| LMAN1    | 62,86  | 2,11E-05 | 0,0006   | TC0300011173.hg.1       |
| LPCAT2   | 62,77  | 0,0016   | 0,0125   | TC0400007344.hg.1       |
| LRMP     | 62,45  | 1,76E-05 | 0,0005   | TC0100010874.hg.1       |
| LY96     | 60,9   | 0,0003   | 0,0035   | TC1300007794.hg.1       |
| MAF      | 60,63  | 5,15E-09 | 5,02E-06 | TC1000012542.hg.1       |
| MERTK    | 60,48  | 1,90E-06 | 0,0001   | TC1200010977.hg.1       |
| MMP14    | 58,09  | 0,0003   | 0,0037   | TC1200012748.hg.1       |
| MRC1     | 58,05  | 2,35E-08 | 1,40E-05 | TC1700007016.hg.1       |
| MS4A4A   | 57,82  | 2,73E-07 | 4,76E-05 | TC1800006589.hg.1       |
| MSR1     | 57,59  | 2,23E-05 | 0,0006   | TC0400011348.hg.1       |
| MYO1G    | 57,33  | 1,01E-06 | 9,30E-05 | TSUnmapped00000244.hg.1 |

|                                  |       |          |          |                         |
|----------------------------------|-------|----------|----------|-------------------------|
| NLRC5                            | 57,26 | 1,54E-07 | 3,93E-05 | TC0600011771.hg.1       |
| NLRP3                            | 57,06 | 0,0003   | 0,0036   | TC0100013305.hg.1       |
| NPL                              | 56,84 | 0,0006   | 0,0063   | TC0200015650.hg.1       |
| OAS1                             | 55,88 | 1,81E-07 | 4,02E-05 | TC0100010454.hg.1       |
| OLFML2B                          | 54,49 | 3,88E-07 | 5,77E-05 | TC1100010946.hg.1       |
| P2RX7                            | 54,19 | 2,21E-06 | 0,0001   | TC1400008689.hg.1       |
| PDCD1LG2                         | 53,97 | 6,09E-07 | 7,18E-05 | TC0500012455.hg.1       |
| PIK3R1                           | 53,59 | 6,05E-07 | 7,18E-05 | TC0500013301.hg.1       |
| PLA2G7                           | 53,46 | 2,10E-05 | 0,0006   | TC0600009381.hg.1       |
| PLAU                             | 53,44 | 1,72E-08 | 1,19E-05 | TC0400007938.hg.1       |
| REL                              | 52,15 | 3,27E-06 | 0,0002   | TC0300010913.hg.1       |
| RGS18                            | 51,97 | 3,97E-06 | 0,0002   | TC0100014769.hg.1       |
| RGS2                             | 51,2  | 2,34E-06 | 0,0002   | TSUnmapped00000484.hg.1 |
| RUNX2                            | 51,19 | 0,0004   | 0,0043   | TC1800007508.hg.1       |
| SAMD9L                           | 51,08 | 1,33E-08 | 9,81E-06 | TC1200010182.hg.1       |
| SELPLG                           | 50,27 | 4,23E-07 | 6,17E-05 | TC1600010951.hg.1       |
| SEPP1                            | 48,75 | 7,76E-06 | 0,0003   | TC0800008467.hg.1       |
| SH2B3                            | 48,34 | 2,19E-06 | 0,0001   | TC1000008234.hg.1       |
| SLAMF8                           | 48,06 | 0,0003   | 0,0033   | TC0500012247.hg.1       |
| SLC17A9                          | 47,21 | 2,85E-07 | 4,84E-05 | TC1100010730.hg.1       |
| SLC29A3                          | 46,41 | 3,84E-06 | 0,0002   | TC0300014092.hg.1       |
| SLC37A2                          | 44,77 | 1,76E-06 | 0,0001   | TC1100012510.hg.1       |
| SLC39A8                          | 43,95 | 8,85E-06 | 0,0003   | TC0100013561.hg.1       |
| SLCO2B1                          | 43,61 | 1,29E-06 | 0,0001   | TC1700007560.hg.1       |
| SPATA13;<br>C1QTNF9              | 41,43 | 1,85E-08 | 1,24E-05 | TC1100006500.hg.1       |
| SPP1                             | 41    | 0,0001   | 0,0022   | TC2000007519.hg.1       |
| STX11                            | 40,25 | 1,34E-05 | 0,0005   | TC0100007290.hg.1       |
| TFEC                             | 39,66 | 9,69E-07 | 9,20E-05 | TC0200010713.hg.1       |
| TMEM106A                         | 39,56 | 5,52E-05 | 0,0011   | TC0500007138.hg.1       |
| TMEM14C                          | 39,14 | 2,16E-06 | 0,0001   | TC0900009513.hg.1       |
| TMEM154                          | 38,84 | 5,63E-07 | 6,98E-05 | TC0900006937.hg.1       |
| TMEM236                          | 38,11 | 5,20E-06 | 0,0002   | TC0200009065.hg.1       |
| TNFAIP3                          | 37,9  | 0,0001   | 0,0018   | TC0300008242.hg.1       |
| TNFRSF11A                        | 37,69 | 1,93E-06 | 0,0001   | TC0500008483.hg.1       |
| TNFRSF11A                        | 37,66 | 4,77E-08 | 2,01E-05 | TC0800010766.hg.1       |
| TNFRSF1B;<br>MIR4632;<br>MIR7846 | 37    | 2,63E-07 | 4,67E-05 | TC0300007485.hg.1       |
| TREM2                            | 36,65 | 1,61E-07 | 3,96E-05 | TC1700011045.hg.1       |
| TREML1                           | 36,59 | 1,14E-06 | 9,85E-05 | TC0200008894.hg.1       |
| TRPV2                            | 35,44 | 6,57E-07 | 7,53E-05 | TC1000012577.hg.1       |
| VSIG4                            | 35,32 | 3,86E-05 | 0,0009   | TC1200009157.hg.1       |
| ZC3H12A;<br>MIR6732              | 35,04 | 1,75E-07 | 4,00E-05 | TSUnmapped00000300.hg.1 |

|                         |       |          |          |                   |
|-------------------------|-------|----------|----------|-------------------|
| AAAS                    | 34,87 | 4,91E-08 | 2,02E-05 | TC1200009735.hg.1 |
| AAMDC                   | 34,49 | 1,12E-05 | 0,0004   | TC1700010358.hg.1 |
| AARS                    | 34,34 | 1,50E-06 | 0,0001   | TC1200010145.hg.1 |
| ABCD3                   | 34,27 | 0,005    | 0,0296   | TC1000012235.hg.1 |
| ACACA                   | 34,21 | 3,45E-06 | 0,0002   | TC0100008126.hg.1 |
| ACKR3                   | 34,08 | 1,06E-07 | 3,26E-05 | TC0200013095.hg.1 |
| ACO1                    | 33,62 | 2,22E-06 | 0,0001   | TC0700009061.hg.1 |
| ADAM17                  | 33,55 | 2,08E-05 | 0,0006   | TC1000009851.hg.1 |
| ADM                     | 33,51 | 2,39E-05 | 0,0006   | TC0500006730.hg.1 |
| ADRBK1                  | 33,33 | 2,05E-05 | 0,0006   | TC1400006659.hg.1 |
| AGTPBP1                 | 33,3  | 5,41E-05 | 0,0011   | TC0600007664.hg.1 |
| AHCTF1                  | 33,07 | 2,99E-05 | 0,0007   | TC1000010276.hg.1 |
| AKR1A1                  | 33,07 | 4,51E-08 | 1,93E-05 | TC1800007667.hg.1 |
| ALCAM                   | 32,7  | 3,81E-07 | 5,77E-05 | TC0100016189.hg.1 |
| ALG1L2                  | 32,34 | 3,55E-06 | 0,0002   | TC0900010866.hg.1 |
| AMBRA1                  | 31,72 | 8,27E-05 | 0,0015   | TC0700011797.hg.1 |
| AMPD2                   | 31,18 | 1,31E-05 | 0,0004   | TC0100012167.hg.1 |
| ANAPC7                  | 30,86 | 1,78E-05 | 0,0005   | TC0900008716.hg.1 |
| ANKDD1A                 | 30,54 | 5,66E-08 | 2,25E-05 | TC0200015476.hg.1 |
| ANKH                    | 30,31 | 3,90E-06 | 0,0002   | TC0900006560.hg.1 |
| ANLN                    | 30,21 | 0,0103   | 0,0517   | TC0700007198.hg.1 |
| ANOS1                   | 30,02 | 5,69E-05 | 0,0011   | TC0900012167.hg.1 |
| ANXA2                   | 29,89 | 3,66E-05 | 0,0009   | TC0900006559.hg.1 |
| ANXA4                   | 29,82 | 5,51E-08 | 2,23E-05 | TC0300013866.hg.1 |
| ANXA4                   | 29,76 | 4,43E-07 | 6,20E-05 | TC1300008533.hg.1 |
| AP2A2                   | 29,49 | 8,77E-05 | 0,0015   | TC0600011124.hg.1 |
| APOA2                   | 29,43 | 3,63E-08 | 1,73E-05 | TC0100016917.hg.1 |
| APOBEC3A                | 29,27 | 1,66E-07 | 4,00E-05 | TC0100010855.hg.1 |
| APOC1                   | 29,12 | 2,21E-05 | 0,0006   | TC0500011225.hg.1 |
| ARHGAP18                | 28,39 | 2,31E-05 | 0,0006   | TC0200010410.hg.1 |
| ARHGAP31                | 28,15 | 0,0007   | 0,0064   | TC1800006448.hg.1 |
| ARHGEF9;<br>ARHGEF9-IT1 | 27,7  | 2,30E-05 | 0,0006   | TC0300008467.hg.1 |
| ARID3B                  | 27,67 | 0,0004   | 0,0045   | TC1500007392.hg.1 |
| ARL4A                   | 27,62 | 3,04E-08 | 1,52E-05 | TC2000008237.hg.1 |
| ARL4C                   | 27,2  | 2,47E-05 | 0,0007   | TC1700010459.hg.1 |
| ARL8A                   | 27,06 | 2,60E-05 | 0,0007   | TC0900007863.hg.1 |
| ARRDC3                  | 26,92 | 1,71E-07 | 4,00E-05 | TC0400007556.hg.1 |
| ARV1                    | 26,72 | 4,91E-06 | 0,0002   | TC0100016018.hg.1 |
| ATF3                    | 26,62 | 4,08E-06 | 0,0002   | TC0100011267.hg.1 |
| ATG2A                   | 26,57 | 0,0012   | 0,0101   | TC1100009408.hg.1 |
| ATG9A                   | 26,44 | 3,07E-05 | 0,0008   | TC0100016135.hg.1 |
| ATIC                    | 26,4  | 6,34E-08 | 2,47E-05 | TC1000011515.hg.1 |
| ATL2                    | 26,2  | 7,62E-07 | 8,13E-05 | TC0200012072.hg.1 |

|                                                                                                                       |       |          |          |                         |
|-----------------------------------------------------------------------------------------------------------------------|-------|----------|----------|-------------------------|
| ATP10D                                                                                                                | 25,82 | 1,79E-05 | 0,0005   | TC1000007954.hg.1       |
| ATP2A3                                                                                                                | 25,7  | 0,0065   | 0,0364   | TC0600007657.hg.1       |
| ATP2B4                                                                                                                | 25,49 | 0,0021   | 0,0156   | TC0400011920.hg.1       |
| ATP5G3                                                                                                                | 25,47 | 0,0046   | 0,0279   | TC1000011368.hg.1       |
| ATP5J2                                                                                                                | 25,29 | 0,0005   | 0,0053   | TC0100011770.hg.1       |
| ATP6V1C1                                                                                                              | 25,03 | 1,57E-07 | 3,95E-05 | TC0200016584.hg.1       |
| ATRN                                                                                                                  | 24,68 | 0,0027   | 0,0184   | TC1200008597.hg.1       |
| AURKB                                                                                                                 | 24,61 | 2,02E-06 | 0,0001   | TC1000007698.hg.1       |
| BANF1                                                                                                                 | 24,49 | 2,79E-05 | 0,0007   | TC0100014408.hg.1       |
| BARD1                                                                                                                 | 24,16 | 8,63E-05 | 0,0015   | TC0700010247.hg.1       |
| BBX                                                                                                                   | 24,1  | 4,54E-07 | 6,20E-05 | TSUnmapped00000777.hg.1 |
| BCAT1                                                                                                                 | 24,03 | 5,19E-07 | 6,66E-05 | TSUnmapped00000138.hg.1 |
| BCL11A                                                                                                                | 24    | 1,69E-07 | 4,00E-05 | TC0400007422.hg.1       |
| BCL2L11                                                                                                               | 23,7  | 4,47E-06 | 0,0002   | TC0700006567.hg.1       |
| BCL3;<br>MIR8085                                                                                                      | 23,55 | 1,81E-07 | 4,02E-05 | TC0100016185.hg.1       |
| BCL7B                                                                                                                 | 23,43 | 1,20E-07 | 3,37E-05 | TC1600007931.hg.1       |
| BCLAF1                                                                                                                | 23,42 | 0,0012   | 0,0105   | TC0800009619.hg.1       |
| BCOR                                                                                                                  | 23,27 | 9,18E-05 | 0,0016   | TC1200009807.hg.1       |
| BLVRB                                                                                                                 | 23,17 | 1,17E-05 | 0,0004   | TC1200009300.hg.1       |
| BMP6                                                                                                                  | 22,85 | 0,0036   | 0,0231   | TC1100013022.hg.1       |
| BOLA3                                                                                                                 | 22,69 | 9,25E-07 | 9,10E-05 | TC0700012968.hg.1       |
| BRI3BP                                                                                                                | 22,68 | 6,98E-05 | 0,0013   | TC0200015893.hg.1       |
| BTBD9                                                                                                                 | 22,59 | 0,0156   | 0,071    | TC0300007324.hg.1       |
| C10orf54                                                                                                              | 22,56 | 9,34E-07 | 9,15E-05 | TC2100008314.hg.1       |
| C11orf73                                                                                                              | 22,35 | 5,15E-06 | 0,0002   | TC0300007257.hg.1       |
| C14orf1                                                                                                               | 22,28 | 4,88E-06 | 0,0002   | TC0800007086.hg.1       |
| C14orf119                                                                                                             | 22,23 | 1,27E-05 | 0,0004   | TC0400008004.hg.1       |
| C15orf39                                                                                                              | 22,12 | 8,96E-05 | 0,0015   | TC0600011870.hg.1       |
| C16orf62                                                                                                              | 21,9  | 6,76E-08 | 2,59E-05 | TC1700007976.hg.1       |
| C16orf72                                                                                                              | 21,85 | 1,16E-06 | 9,96E-05 | TC1700012126.hg.1       |
| C16orf87                                                                                                              | 21,68 | 1,91E-06 | 0,0001   | TC1700012226.hg.1       |
| C17orf62                                                                                                              | 21,5  | 2,85E-05 | 0,0007   | TSUnmapped00000077.hg.1 |
| C18orf25                                                                                                              | 21,41 | 3,81E-06 | 0,0002   | TC1200012666.hg.1       |
| C21orf59                                                                                                              | 21,15 | 1,27E-07 | 3,41E-05 | TC1400010757.hg.1       |
| C2orf88                                                                                                               | 21,06 | 8,02E-07 | 8,27E-05 | TC0700013468.hg.1       |
| C6orf191andA<br>RHGAP18;<br>RP1-69D17.4;<br>RP1-69D17.3;<br>TCONS_I2_00<br>025470;<br>TCONS_I2_00<br>024911;<br>LAMA2 | 21,05 | 0,0004   | 0,0043   | TC0300010943.hg.1       |
| CALU                                                                                                                  | 21,04 | 3,07E-07 | 4,99E-05 | TC0700013609.hg.1       |
| CAMK1                                                                                                                 | 20,99 | 1,02E-07 | 3,20E-05 | TC0300013852.hg.1       |

|         |       |          |        |                   |
|---------|-------|----------|--------|-------------------|
| CAMP    | 20,68 | 0,0004   | 0,0048 | TC1100008341.hg.1 |
| CAPG    | 20,66 | 1,21E-06 | 0,0001 | TC2100007032.hg.1 |
| CARD19  | 20,58 | 0,0007   | 0,0071 | TC0400011748.hg.1 |
| CBR1    | 20,53 | 0,0077   | 0,0414 | TC1700008228.hg.1 |
| CCDC126 | 20,34 | 0,0003   | 0,0036 | TC0400012949.hg.1 |

<sup>1</sup>Two-sided p-values derived from one-way ANOVAs. <sup>2</sup>False discovery rate adjusted p-values.

Monocytes were derived from 2 subjects (3 samples; n = 6) and induced microglia-like cells from 3 subjects (3 samples; n = 9). Only genes upregulated with a fold change > 20 are included in the table.

**Supplementary Table 4. Genes upregulated in induced microglia-like cells (iMGs) vs. monocyte-derived macrophages.**

| <b>Microglial genes from Bennett et al 2016</b>                         |                    |                            |                                |                            |
|-------------------------------------------------------------------------|--------------------|----------------------------|--------------------------------|----------------------------|
| <b>Microglial genes from Gosselin et al 2017</b>                        |                    |                            |                                |                            |
| <b>Microglial genes from Bennett et al 2016 and Gosselin et al 2017</b> |                    |                            |                                |                            |
| <b>Gene Symbol</b>                                                      | <b>Fold Change</b> | <b>P-value<sup>1</sup></b> | <b>FDR P-value<sup>2</sup></b> | <b>Affymetrix probe ID</b> |
| CCL13                                                                   | 754,76             | 1,02E-08                   | 6,61E-05                       | TC1700007561.hg.1          |
| CD163                                                                   | 666,99             | 1,83E-09                   | 3,93E-05                       | TC1200012749.hg.1          |
| CLEC5A                                                                  | 495,02             | 4,63E-06                   | 0,0014                         | TC0700012849.hg.1          |
| FCGBP                                                                   | 340,67             | 1,99E-05                   | 0,0035                         | TSUnmapped00000392.hg.1    |
| RNASE1                                                                  | 274,28             | 3,89E-07                   | 0,0003                         | TC1400008606.hg.1          |
| MS4A6A                                                                  | 271,19             | 1,11E-07                   | 0,0001                         | TC1100010996.hg.1          |
| ANKRD22                                                                 | 247,75             | 8,05E-05                   | 0,0086                         | TC1000011368.hg.1          |
| COLEC12                                                                 | 206,22             | 5,23E-08                   | 0,0001                         | TC1800007850.hg.1          |
| CLDN1                                                                   | 191,89             | 6,74E-08                   | 0,0001                         | TC0300013520.hg.1          |
| PPBP                                                                    | 179,89             | 2,19E-08                   | 7,82E-05                       | TC0400011013.hg.1          |
| TGFBI                                                                   | 163,73             | 9,09E-06                   | 0,0021                         | TC0500008736.hg.1          |
| CH25H                                                                   | 146,72             | 0,0001                     | 0,0102                         | TC1000011376.hg.1          |
| CD14                                                                    | 114,21             | 2,16E-05                   | 0,0037                         | TC0500012247.hg.1          |
| TMEM236                                                                 | 112,65             | 1,94E-08                   | 7,82E-05                       | TC1000006911.hg.1          |
| CCL2^                                                                   | 107,81             | 5,08E-06                   | 0,0014                         | TC1700007557.hg.1          |
| TREM1                                                                   | 105,25             | 2,59E-06                   | 0,0009                         | TC0600011777.hg.1          |
| PMP22                                                                   | 98,63              | 6,19E-09                   | 6,61E-05                       | TC1700009850.hg.1          |
| SEPP1                                                                   | 92,45              | 1,25E-07                   | 0,0001                         | TC0500010615.hg.1          |
| FPR3                                                                    | 83,87              | 7,03E-05                   | 0,0079                         | TC1900008669.hg.1          |
| OLFML2B                                                                 | 75,54              | 7,84E-07                   | 0,0004                         | TC0100016199.hg.1          |
| C3AR1                                                                   | 72,81              | 2,23E-06                   | 0,0009                         | TC1200009807.hg.1          |
| FCGR2C                                                                  | 67,85              | 3,02E-06                   | 0,001                          | TC0100018309.hg.1          |
| C1QC                                                                    | 66,87              | 7,12E-05                   | 0,0079                         | TC0100007291.hg.1          |
| IL7R                                                                    | 64,78              | 2,18E-05                   | 0,0037                         | TC0500007138.hg.1          |
| FCGR2B                                                                  | 63,42              | 0,0004                     | 0,0243                         | TC0100018310.hg.1          |
| ETV5                                                                    | 61,57              | 2,43E-07                   | 0,0002                         | TC0300014082.hg.1          |
| FCGR2A                                                                  | 57,46              | 1,91E-07                   | 0,0002                         | TC0100018308.hg.1          |
| AIF1                                                                    | 51,74              | 6,72E-08                   | 0,0001                         | TC0600007598.hg.1          |
| MGAM                                                                    | 48,32              | 4,99E-06                   | 0,0014                         | TC0700013471.hg.1          |
| CCL8                                                                    | 44,65              | 4,32E-07                   | 0,0003                         | TC1700007560.hg.1          |
| GPR34                                                                   | 43,95              | 1,00E-05                   | 0,0023                         | TC0X00007039.hg.1          |
| SLCO2B1                                                                 | 40,61              | 1,43E-06                   | 0,0006                         | TC1100008453.hg.1          |
| CMKLR1                                                                  | 39,13              | 4,72E-05                   | 0,0059                         | TC1200011838.hg.1          |
| MEF2C                                                                   | 37,28              | 2,59E-06                   | 0,0009                         | TC0500011418.hg.1          |
| STAB1                                                                   | 34,15              | 1,36E-06                   | 0,0006                         | TC0300007484.hg.1          |

|                            |       |          |          |                   |
|----------------------------|-------|----------|----------|-------------------|
| CD163L1                    | 32,39 | 0,0003   | 0,018    | TC1200012748.hg.1 |
| CD3E                       | 32,33 | 0,0365   | 0,3204   | TC1100009200.hg.1 |
| CREB5                      | 30,44 | 2,69E-08 | 8,24E-05 | TC0700007034.hg.1 |
| S1PR1                      | 30,34 | 0,0004   | 0,0225   | TC0100009241.hg.1 |
| WLS                        | 28,95 | 4,74E-05 | 0,0059   | TC0100014531.hg.1 |
| FCGR3A                     | 27,66 | 3,62E-08 | 8,63E-05 | TC0100016185.hg.1 |
| CD96                       | 27,26 | 0,163    | 0,6348   | TC0300008320.hg.1 |
| CIDEB                      | 26,71 | 0,0006   | 0,0291   | TC1400008752.hg.1 |
| GPR84                      | 26,68 | 2,28E-05 | 0,0039   | TC1200010837.hg.1 |
| VSIG4                      | 25,97 | 4,51E-05 | 0,0059   | TC0X00009911.hg.1 |
| FOLR2                      | 24,24 | 0,0002   | 0,0149   | TC1100008341.hg.1 |
| SAMSN1                     | 23,64 | 0,0001   | 0,0121   | TC2100007599.hg.1 |
| RGL1                       | 23,01 | 0,0001   | 0,0099   | TC0100010874.hg.1 |
| PLTP                       | 23    | 4,79E-07 | 0,0003   | TC2000009250.hg.1 |
| LRRC25                     | 22,46 | 5,71E-05 | 0,0068   | TC1900010013.hg.1 |
| CLEC4A                     | 22,19 | 8,26E-08 | 0,0001   | TC1200012593.hg.1 |
| FCGR3B                     | 22,04 | 2,76E-07 | 0,0002   | TC0100016189.hg.1 |
| PLAU                       | 21,35 | 3,91E-05 | 0,0054   | TC1000008054.hg.1 |
| TNFSF13                    | 20,3  | 6,60E-06 | 0,0017   | TC1700012186.hg.1 |
| C1QA                       | 20,26 | 1,68E-05 | 0,0033   | TC0100007290.hg.1 |
| P3H2                       | 20,04 | 0,0002   | 0,016    | TC0300013513.hg.1 |
| LGALS12                    | 19,43 | 0,0017   | 0,0599   | TC1100007897.hg.1 |
| HPSE                       | 19,35 | 3,26E-07 | 0,0002   | TC0400011203.hg.1 |
| CD3D                       | 19,3  | 0,1188   | 0,557    | TC1100012478.hg.1 |
| MPEG1                      | 19,23 | 2,16E-05 | 0,0037   | TC1100010962.hg.1 |
| LGMN                       | 18,81 | 0,0004   | 0,0237   | TC1400010012.hg.1 |
| CD209                      | 18,59 | 2,59E-05 | 0,0042   | TC1900009493.hg.1 |
| IL1B                       | 18,42 | 0,0045   | 0,1023   | TC0200013916.hg.1 |
| TNFRSF11A                  | 17,77 | 0,0027   | 0,0748   | TC1800007508.hg.1 |
| C1QB                       | 17,32 | 0,0005   | 0,0267   | TC0100007292.hg.1 |
| IFITM3                     | 16,84 | 0,0002   | 0,0163   | TC1100009657.hg.1 |
| FCGR1A                     | 16,41 | 5,20E-05 | 0,0063   | TC0100009866.hg.1 |
| LY75-CD302;<br>CD302; LY75 | 16,36 | 3,04E-06 | 0,001    | TC0200014728.hg.1 |
| LILRB5                     | 15,81 | 1,65E-05 | 0,0032   | TC1900011406.hg.1 |
| ENPP2                      | 14,62 | 0,0038   | 0,0911   | TC0800011620.hg.1 |
| FCGBP                      | 14,43 | 0,0168   | 0,2126   | TC1900010676.hg.1 |
| LACC1                      | 14,3  | 1,59E-05 | 0,0032   | TC1300009956.hg.1 |
| LGALS2                     | 14,25 | 0,36     | 0,8157   | TC2200008661.hg.1 |
| ADAP2                      | 13,89 | 2,46E-06 | 0,0009   | TC1700012226.hg.1 |
| MMP12                      | 13,05 | 0,1788   | 0,6554   | TC1100012134.hg.1 |
| MAF                        | 13,01 | 4,37E-06 | 0,0013   | TC1600010951.hg.1 |
| RUNX1                      | 12,77 | 8,17E-05 | 0,0086   | TC2100008562.hg.1 |
| AP1S2                      | 12,5  | 6,32E-06 | 0,0017   | TC0X00009139.hg.1 |

|           |       |          |        |                   |
|-----------|-------|----------|--------|-------------------|
| HLA-DQA2  | 12,12 | 0,0003   | 0,017  | TC0600007664.hg.1 |
| F13A1     | 11,89 | 0,0011   | 0,046  | TC0600010709.hg.1 |
| ANLN      | 11,82 | 0,0456   | 0,3594 | TC0700007198.hg.1 |
| STEAP1    | 11,52 | 0,0015   | 0,0545 | TC0700008292.hg.1 |
| CD74      | 11,21 | 0,0094   | 0,1509 | TC0500012470.hg.1 |
| IPCEF1    | 11,1  | 0,0001   | 0,0112 | TC0600014360.hg.1 |
| PRC1      | 11,09 | 0,0172   | 0,2157 | TC1500010463.hg.1 |
| AP2A2     | 10,62 | 4,61E-07 | 0,0003 | TC1100006500.hg.1 |
| HLA-DQA1  | 10,42 | 0,0172   | 0,2157 | TC0600007657.hg.1 |
| NLRP3     | 10,42 | 1,08E-05 | 0,0024 | TC0100012315.hg.1 |
| TNFRSF11A | 10,37 | 2,86E-05 | 0,0045 | TC1800007506.hg.1 |
| CSF2RA    | 10,21 | 0,0002   | 0,0138 | TC0Y00006444.hg.1 |
| GPR183    | 10,16 | 0,002    | 0,065  | TC1300009598.hg.1 |
| DOK2      | 10,03 | 6,30E-07 | 0,0004 | TC0800009819.hg.1 |

<sup>1</sup>Two-sided p-values derived from one-way ANOVAs. <sup>2</sup>False discovery rate adjusted p-values.

Macrophages were derived from 3 subjects (3 samples; n = 9) and induced microglia-like cells from 3 subjects (3 samples; n = 9). Only genes upregulated with a fold change > 20 are included in the table.



**Supplementary Table 5. Affymetrix gene array characterization of iPSC-derived neural cultures.**

| Gene Symbol | Description                         | Fold Change | P-value <sup>1</sup> | FDR P-value <sup>2</sup> | Affymetrix Probe ID |
|-------------|-------------------------------------|-------------|----------------------|--------------------------|---------------------|
| ZIC1        | <i>forebrain cortical</i>           | 1097,99     | 6,97E-06             | 0,0002                   | TC0300013886.hg.1   |
| NCAM1       | <i>pan-neuronal</i>                 | 318,73      | 3,17E-07             | 3,11E-05                 | TC1100009068.hg.1   |
| GRIA2       | <i>AMPA receptors</i>               | 233,91      | 4,05E-08             | 9,54E-06                 | TC0400009110.hg.1   |
| NR2F1       | <i>cerebral cortex</i>              | 175,42      | 4,21E-05             | 0,0008                   | TC0500008086.hg.1   |
| MAP2        | <i>pan-neuronal</i>                 | 161,43      | 1,14E-09             | 3,80E-06                 | TC0200010636.hg.1   |
| DCX         | <i>pan-neuronal</i>                 | 155,87      | 5,86E-08             | 1,16E-05                 | TC0X00010516.hg.1   |
| CXCR4       | <i>neural progenitor</i>            | 92,32       | 3,11E-05             | 0,0006                   | TC0200014414.hg.1   |
| MAPT        | <i>pan-neuronal</i>                 | 53,47       | 6,27E-07             | 4,83E-05                 | TC1700008082.hg.1   |
| NCAM1       | <i>pan-neuronal</i>                 | 30,72       | 1,19E-05             | 0,0003                   | TC1100009075.hg.1   |
| GRIN2B      | <i>NMDA receptors</i>               | 29,31       | 1,24E-05             | 0,0003                   | TC1200009997.hg.1   |
| RELN        | <i>Telencephalic</i>                | 27,34       | 0,0014               | 0,0094                   | TC0700012126.hg.1   |
| ANK2        | <i>cerebral cortex / cerebellum</i> | 14,54       | 2,23E-06             | 0,0001                   | TC0400008450.hg.1   |
| GRIA1       | <i>AMPA receptors</i>               | 14,07       | 1,15E-05             | 0,0003                   | TC0500009141.hg.1   |
| CD44        | <i>neural progenitor</i>            | 13,49       | 0,0067               | 0,0303                   | TC1100007273.hg.1   |
| PAX6        | <i>neural progenitor</i>            | 9,66        | 0,0042               | 0,0214                   | TC1100010456.hg.1   |
| ASCL1       | <i>Diencephalon</i>                 | 7,91        | 8,80E-05             | 0,0013                   | TC1200008650.hg.1   |
| S100B       | <i>Astrocyte</i>                    | 7,88        | 0,0002               | 0,0019                   | TC2100008477.hg.1   |
| CACNA1C     | <i>calcium channel</i>              | 6,71        | 0,0002               | 0,002                    | TC1200012570.hg.1   |
| DLG4        | <i>post-synaptic</i>                | 6,54        | 3,82E-05             | 0,0007                   | TC1700009619.hg.1   |
| SNAP25      | <i>pre-synaptic</i>                 | 5,98        | 0,0001               | 0,0016                   | TC2000006688.hg.1   |
| ZFPM2       | <i>cerebral cortex</i>              | 5,1         | 0,0039               | 0,0201                   | TC0800012344.hg.1   |
| SYP         | <i>pre-synaptic</i>                 | 4,19        | 0,0005               | 0,0046                   | TC0X00009661.hg.1   |
| B3GAT2      | <i>neural crest</i>                 | 4,17        | 0,0002               | 0,0024                   | TC0600012257.hg.1   |
| GPHN        | <i>post-synaptic</i>                | 4,09        | 0,0002               | 0,002                    | TC1400007478.hg.1   |
| FOXP2       | <i>Diencephalon</i>                 | 4,01        | 0,0465               | 0,1277                   | TC0700008849.hg.1   |
| PROX1       | <i>hippocampal / cerebellum</i>     | 3,74        | 0,0009               | 0,0067                   | TC0100011566.hg.1   |
| NEUROD1     | <i>Telencephalic</i>                | 3,47        | 0,0013               | 0,0088                   | TC0200016755.hg.1   |

|        |                                  |         |          |          |                   |
|--------|----------------------------------|---------|----------|----------|-------------------|
| SOX5   | <i>Telencephalic</i>             | 3,03    | 0,0002   | 0,0026   | TC1200010130.hg.1 |
| GRIA3  | <i>AMPA receptors</i>            | 2,93    | 0,0205   | 0,0697   | TC0X00008316.hg.1 |
| GRIA1  | <i>AMPA receptors</i>            | 2,88    | 0,0025   | 0,0143   | TC0500009147.hg.1 |
| BSN    | <i>pre-synaptic</i>              | 2,77    | 0,0037   | 0,0193   | TC0300007385.hg.1 |
| STX1A  | <i>pre-synaptic</i>              | 2,66    | 0,0028   | 0,0159   | TC0700011500.hg.1 |
| GAD2   | <i>cortical GABAergic neuron</i> | 2,62    | 0,0163   | 0,0589   | TC1000007068.hg.1 |
| ZFPM2  | <i>cerebral cortex</i>           | 2,55    | 0,0433   | 0,1213   | TC0800012343.hg.1 |
| TUBB3  | <i>pan-neuronal</i>              | 2,51    | 0,0027   | 0,0155   | TC1600011453.hg.1 |
| SYN1   | <i>pre-synaptic</i>              | 2,5     | 0,0004   | 0,0039   | TC0X00009576.hg.1 |
| SOX1   | <i>telencephalic progenitor</i>  | 2,39    | 0,0087   | 0,0367   | TC1300008059.hg.1 |
| POU3F2 | <i>Telencephalic</i>             | 2,12    | 0,0023   | 0,0135   | TC0600008897.hg.1 |
| CAMK2A | <i>post-synaptic</i>             | 2,06    | 0,0038   | 0,0197   | TC0500012463.hg.1 |
| FLT1   | <i>Mesodermal</i>                | -13,99  | 8,75E-07 | 5,94E-05 | TC1300008463.hg.1 |
| FOXO1  | <i>hindbrain / cerebellum</i>    | -14,66  | 8,97E-07 | 6,03E-05 | TC1300008688.hg.1 |
| DIAPH3 | <i>cerebral cortex</i>           | -17,43  | 6,25E-05 | 0,001    | TC1300009088.hg.1 |
| PROM1  | <i>stem cell marker</i>          | -25,74  | 8,28E-07 | 5,75E-05 | TC0400012903.hg.1 |
| ZFP42  | <i>pluripotency marker</i>       | -40,89  | 3,92E-08 | 9,54E-06 | TC0400009588.hg.1 |
| NANOG  | <i>pluripotency marker</i>       | -54,92  | 3,80E-08 | 9,50E-06 | TC1200006688.hg.1 |
| MKI67  | <i>proliferation marker</i>      | -65,39  | 2,51E-06 | 0,0001   | TC1000012235.hg.1 |
| POU5F1 | <i>pluripotency marker</i>       | -102,02 | 7,29E-09 | 4,90E-06 | TC0600011406.hg.1 |
| OTX2   | <i>progenitor marker</i>         | -102,16 | 2,57E-08 | 8,43E-06 | TC1400009282.hg.1 |
| LIN28A | <i>pluripotency marker</i>       | -147,81 | 3,43E-09 | 4,72E-06 | TC0100007457.hg.1 |

<sup>1</sup>Two-sided p-values derived from one-way ANOVAs. <sup>2</sup>False discovery rate adjusted p-values.

iPSCs generated from n=2 subjects and iPSC-derived neurons generated from n=4 subjects.

Genes were selected based on Zhang, Y., *et al.* (Rapid single-step induction of functional neurons from human pluripotent stem cells. *Neuron* **78**, 785-798 (2013)). In table only genes displaying a fold change > 2 ( with P(FDR) < 0.05) are shown.

**Supplementary Table 6. Clinical characteristics for participants in main experiments.**

| Experiment                 | SZ-SZ vs. HC-HC (pHrdo) |                      | SZ-SZ vs. HC-HC (PSD-95) |          | SZ-SZ vs. HC-HC (co-culture) |          | SZ-SZ vs. SZ-HC vs. HC-HC (pHrdo) |          | SZ-SZ vs. HC-SZ vs. HC-HC (pHrdo) |    | SZ-SZ vs. SZ-SZ vs. SZ-HC vs. HC-HC (PSD-95) |          | SZ-SZ vs. HC-SZ vs. HC-HC (PSD-95) |    | Mincycline pre-treatment |
|----------------------------|-------------------------|----------------------|--------------------------|----------|------------------------------|----------|-----------------------------------|----------|-----------------------------------|----|----------------------------------------------|----------|------------------------------------|----|--------------------------|
|                            | PANSS                   | IQ                   | PANSS                    | IQ       | PANSS                        | IQ       | PANSS                             | IQ       | PANSS                             | IQ | PANSS                                        | IQ       | PANSS                              | IQ |                          |
| SZ IMGs                    | n                       | 13                   | 13                       | 3        | 8                            | 10       | 6                                 | 6        | 6                                 | 6  | 6                                            | 2        |                                    |    | 2                        |
|                            | MR                      | 43 (11)              | 43 (10)                  | 36 (13)  | 43 (12)                      | 43 (8)   | 43 (10)                           | 43 (10)  | 42 (16)                           |    |                                              | Not done |                                    |    |                          |
|                            | Vocab <sup>3</sup>      | 39 (15)              | 50 (22)                  | 39 (3)   | 38 (9)                       | 37 (18)  | 38 (10)                           | 47 (14)  |                                   |    |                                              | Not done |                                    |    |                          |
|                            | IQ <sup>4</sup>         | 85 (20)              | 94 (19)                  | 67 (10)  | 82 (13)                      | 82 (21)  | 82 (15)                           | 82 (20)  |                                   |    |                                              | Not done |                                    |    |                          |
| HC IMGs                    | n                       | 9                    | 18                       | 2        | 13                           | 5        | 6                                 | 6        | 6                                 | 6  | 10                                           |          |                                    |    |                          |
|                            | MR                      | 48 (27)              | 53 (27)                  | 45       | 51 (29)                      | 62 (17)  | 47 (33)                           | 58 (24)  |                                   |    |                                              | 61 (23)  |                                    |    |                          |
|                            | Vocab <sup>3</sup>      | 52 (12)              | 53 (13)                  | 44       | 52 (15)                      | 54 (15)  | 51 (18)                           | 58 (21)  |                                   |    |                                              | 55 (13)  |                                    |    |                          |
|                            | IQ <sup>4</sup>         | 109 (29)             | 111 (28)                 | 90       | 104 (39)                     | 117 (7)  | 99 (42)                           | 117 (19) |                                   |    |                                              | 116 (33) |                                    |    |                          |
| SZ SYN (or neural culture) | n                       | 3                    | 4                        | 3        | 2                            | 3        | 2                                 | n/a      |                                   |    | 1                                            |          |                                    |    |                          |
|                            | MR                      | 44 (10)              | 47 (9)                   | 46 (21)  | 43                           | 43 (2)   | 43                                | n/a      |                                   |    | 52                                           |          |                                    |    |                          |
|                            | Vocab <sup>3</sup>      | 43 (12)              | 46 (25)                  | 49 (17)  | 40                           | 43 (13)  | 40                                | n/a      |                                   |    | 49                                           |          |                                    |    |                          |
|                            | IQ <sup>4</sup>         | 89 (19)              | 95 (29)                  | 101 (27) | 86                           | 89 (12)  | 86                                | n/a      |                                   |    | 101                                          |          |                                    |    |                          |
| HC SYN (or neural culture) | n                       | 3                    | 4                        | 3        | 2                            | 3        | 2                                 | n/a      |                                   |    | 1                                            |          |                                    |    |                          |
|                            | MR                      | 100 (36)             | 100 (27)                 | 107      | 108 (15)                     | 100 (36) | n/a                               | 100 (36) |                                   |    | 100 (36)                                     |          |                                    |    |                          |
|                            | Vocab <sup>3</sup>      | 52 (20)              | 52 (15)                  | 51       | 56 (6)                       | 52 (20)  | n/a                               | 52 (20)  |                                   |    | 52 (20)                                      |          |                                    |    |                          |
|                            | IQ <sup>4</sup>         | 48 <sup>5</sup> (22) | 48 (17)                  | 48       | 52 (12)                      | 48 (22)  | n/a                               | 48 (22)  |                                   |    | 48 (22)                                      |          |                                    |    |                          |

<sup>1</sup>Number of subjects. <sup>2</sup>Matrix Reasoning subtest – WASI-II. T-scores. <sup>3</sup>Vocabulary subtest – WASI-II. T-scores. <sup>4</sup>IQ composite score – WASI-II. T-scores. <sup>5</sup>Positive and Negative Syndrome Scale. Total score. <sup>6</sup>All data given as median with interquartile rang

All schizophrenia (SZ) subjects were males between 25 and 60 years old and healthy controls (HCs) were matched on sex and age. Mean age in SZ subjects was 40.3 years (SD: 10.2) and among HCs 42.6 years (12.6).

**Supplementary Table 7. Details of antibodies used for immunohistochemistry (ICC).**

| <b>Antibody</b>  | <b>Company</b>                          | <b>Catalog number</b> | <b>Host species</b> | <b>Concentration</b> |
|------------------|-----------------------------------------|-----------------------|---------------------|----------------------|
| TMEM 119         | Abcam                                   | Ab185337              | Rabbit              | 1:50                 |
| P2RY12           | Alomone labs                            | Apr-020               | Rabbit              | 1:100                |
| PU.1             | Abcam                                   | Ab88082               | Mouse               | 1:50                 |
| OCT 4            | Cell signaling                          | 2840                  | Rabbit              | 1:400                |
| TRA 1-60         | Abcam                                   | Ab16288               | Mouse               | 1:500                |
| NESTIN           | Emd millipore                           | Abd69                 | Rabbit              | 1:500                |
| PAX6             | Developmental studies<br>hybridoma bank | Pax6                  | Mouse               | 1:100                |
| SOX 1            | Cell signaling                          | 4194s                 | Rabbit              | 1:200                |
| SOX 2            | Cell signaling                          | 3579s                 | Rabbit              | 1:200                |
| MAP2             | Abcam                                   | Ab92434               | Chicken             | 1:1000               |
| BETA III TUBULIN | Millipore                               | Mab5564               | Mouse               | 1:1000               |
| PSD95            | Abcam                                   | Ab13552               | Mouse               | 1:250                |
| C4               | Abcam                                   | Ab173577              | Rabbit              | 1:250                |
| CD68             | Abcam                                   | Ab213363              | Rabbit              | 1:100                |

See also Life Sciences Reporting Summary for details regarding validation.
